# Supplementary material for: Luminescent polypyridyl heteroleptic CrIII complexes with high quantum yields and long excited state lifetimes
Source: Royal Society of Chemistry journal article supplement (doi:10.1039/d0dt02872j), 2020-01-01
Supplement: d0dt02872j1.pdf [file d0dt02872j1.pdf]

# **Luminescent Polypyridyl Heteroleptic Cr<sup>III</sup> Complexes with High Quantum Yields and Long Excited State Lifetimes**

Juan-Ramón Jiménez,\* Maxime Poncet, Benjamin Doistau, Céline Besnard and Claude Piguet\*

## **Supporting Information**

(37 pages)

## Appendix 1. Experimental section.

### Solvents and starting materials

Reagent grade acetonitrile (ACN) was distilled from CaH<sub>2</sub>. All other chemicals such as CrCl<sub>3</sub>·3THF, AgCF<sub>3</sub>SO<sub>3</sub>, (*n*-Bu<sub>4</sub>)NPF<sub>6</sub> and organic solvents were purchased from commercial suppliers and used without further purification. The ligand ddpd, dqp and dqpOMe were prepared according to published methods.<sup>S1-S2</sup>

**Preparation of [Cr(dqp)Cl<sub>3</sub>].** The ligand dqp (250 mg, 0.75 mmol) was added into a solution of CrCl<sub>3</sub>·3THF (280 mg, 0.75 mmol) in propan-2-ol (15 mL). The resulting green solution was heated in a microwave to 160°C during 4 h. The mixture was filtered and the green solid was washed with warm ethanol (2 x 10 mL), dichloromethane (20 mL) and diethyl ether (2 x 20 mL). The product was dried under vacuum to obtain a crystalline green powder [Cr(dqp)Cl<sub>3</sub>] (yield 90%). Slow diffusion of diethyl ether into a concentrated solution of the complex in *N,N'*-dimethylformamide led to the formation of green crystals suitable for X-ray diffraction. Elemental analysis: Calcd for: C<sub>23</sub>H<sub>15</sub>Cl<sub>3</sub>CrN<sub>3</sub>·0.1H<sub>2</sub>O·0.3CH<sub>2</sub>Cl<sub>2</sub> C, 53.9; H, 3.42; N, 8.09. Found C, 53.8; H, 3.47; N, 8.11.

**Preparation of [Cr(dqp)(SO<sub>3</sub>CF<sub>3</sub>)<sub>3</sub>].** A mixture of [Cr(dqp)Cl<sub>3</sub>] (50 mg, 0.09 mmol) and silver triflate (83 mg, 0.32 mmol) in distilled acetonitrile (1 mL), was heated under microwave irradiation in a sealed cap at 140°C during 30 min. After cooling to room temperature, the resulting red solution was filtered to remove the AgCl generated during the reaction. ESI-MS (CH<sub>3</sub>CN) *m/z*: [Cr(dqp)(OSO<sub>2</sub>CF<sub>3</sub>)<sub>2</sub>]<sup>+</sup> calc: 682.9, found: 682.9 (Figure S1). This solution was used directly for the next step.

**Preparation of [Cr(dqp)(tpy)](PF<sub>6</sub>) (1).** A red solution of [Cr(dqp)(OSO<sub>2</sub>CF<sub>3</sub>)<sub>3</sub>] in distilled acetonitrile was loaded into a 5 ml MW vial containing 1 equivalent of the tpy ligand in 1 mL of CH<sub>3</sub>CN. The solution was heated under microwave irradiation for 12h at 70°C. After cooling to room temperature, the solvent was removed under reduced pressure yielding an orange residue. The orange residue was dissolved in methanol (2 mL) and few drops of a saturated methanol solution of (*n*-Bu<sub>4</sub>)NPF<sub>6</sub> were added. The yellow precipitate was filtered and washed with cold MeOH (1 x 5 mL), dichloromethane (20 mL) and diethyl ether (2 x 15 mL) to give [Cr(dqp)(tpy)](PF<sub>6</sub>)<sub>3</sub> (yield 40%) as a fine yellow powder. Slow diffusion of diethyl ether into a concentrated solution of the complex in acetonitrile led to the formation of orange crystals suitable for XRD. Elemental Analysis: Calcd for C<sub>38</sub>H<sub>26</sub>CrF<sub>18</sub>N<sub>6</sub>P<sub>3</sub>·2.2CH<sub>2</sub>Cl<sub>2</sub>·1.3CH<sub>3</sub>CN: C, 39.73; H, 2.67; N, 7.9 found C, 39.72; H, 2.68; N, 7.90.

**Preparation of [Cr(dqp)(L)](CF<sub>3</sub>SO<sub>3</sub>)<sub>3</sub> (L = ddpd (2) dqpOMe (3)).** A red solution of [Cr(dqp)(OSO<sub>2</sub>CF<sub>3</sub>)<sub>3</sub>] in distilled acetonitrile was loaded into a 5 ml MW vial containing 1 equivalent of ddpd or dqpOMe in 1 mL distilled acetonitrile. The solution was heated under microwave irradiation for 6h at 120°C and 140°C respectively. After cooling to room temperature, acetonitrile was added and the mixture filtered to remove impurities. The solvent was then removed under reduced pressure yielding an orange residue. The orange residue was dissolved in water, filtered, evaporated again and dried under vacuum to give [Cr(ddpd)(dqp)](CF<sub>3</sub>SO<sub>3</sub>CF<sub>3</sub>)<sub>3</sub> (yield 60%) and [Cr(dqp)(dqpOMe)](CF<sub>3</sub>SO<sub>3</sub>)<sub>3</sub> (yield

80%). The orange residue was dissolved in acetonitrile and precipitate slowly with diethyl ether to give in both cases an orange/yellow precipitate which was washed with cold MeOH (1 x 5 mL), dichloromethane (20 mL) and diethyl ether (2 x 15 mL). Slow diffusion of diethyl ether into a concentrated solutions of the complexes in acetonitrile led to the formation of orange crystals suitable for XRD. ESI-MS (CH<sub>3</sub>CN) *m/z*: [Cr(ddpd)(dqp)](CF<sub>3</sub>SO<sub>3</sub>)<sub>2</sub><sup>+</sup> calc: 945.9, found: 946.0. Elemental analysis: Calcd C<sub>53</sub>H<sub>40</sub>CrF<sub>9</sub>N<sub>6</sub>O<sub>10</sub>S<sub>3</sub>·0.9CH<sub>2</sub>Cl<sub>2</sub>·0.35CH<sub>3</sub>CN: C, 49.27; H, 3.25 N, 6.68 found C, 49.14; H, 2.99; N, 6.94. ESI-MS (CH<sub>3</sub>CN) *m/z*: [Cr(dqp)(dqpOe)](CF<sub>3</sub>SO<sub>3</sub>)<sub>2</sub><sup>+</sup> calc: 1046., found: 1046.1. Elemental analysis: Calcd C<sub>43</sub>H<sub>32</sub>CrF<sub>9</sub>N<sub>8</sub>O<sub>9</sub>S<sub>3</sub>·1.3H<sub>2</sub>O: C, 45.01; H, 3.04 N, 9.77 found C, 45.01; H, 3.05; N, 9.75.

### Spectroscopic and analytical measurements.

Pneumatically-assisted electrospray (ESI) mass spectrum was recorded from 10<sup>-4</sup> M solution on an Applied Biosystems API 150EX LC/MS System equipped with a Turbo Ionspray source<sup>®</sup>. Elemental analyses were performed by K. L. Buchwalder from the Microchemical Laboratory of the University of Geneva. Absorption spectra in water solution were recorded using a Lambda 1050 Perkin Elmer spectrometer (quartz cell path length 1 cm or 1 mm, 290-800 nm domain, 2×10<sup>-4</sup> mol/L and 650-800 nm domain). Emission spectra (excitation at 355 nm) was recorded from either room temperature or frozen solution samples (for frozen solutions: CH<sub>3</sub>CN/propionitrile 6/4 at C ≈ 5×10<sup>-3</sup> mol/L), or freeze-pump-thaw degassed acetonitrile solution (C ≈ 10<sup>-4</sup> mol/L) for room temperature solutions 293 K, with a Fluorolog (Horiba Jobin-Yvon), equipped with iHR320, a Xenon lamp 450 Watt Illuminator (FL-1039A/40A) and a water-cooled photo multiplier tube (PMT Hamamatsu R2658 or R928), and corrected for the spectral response of the system. The emission spectra were recorded as a function of the wavelength and transformed into wavenumbers.<sup>S3</sup> For time-resolved experiments, the decay curves were recorded from previously excited samples at 77K and 293K, with a photomultiplier (Hamamatsu R2658 or R928) and a digital oscilloscope (Tektronix MDO4104C). Pulsed excitation at 355 nm was obtained with the third harmonic of a pulsed Nd:YAG laser (Quantel Qsmart 850). Low temperature (77 K) was achieved using liquid quartz transparent Dewar filled with liquid N<sub>2</sub> in the centre of which samples were placed. Samples solutions (CH<sub>3</sub>CN/propionitrile) 6/4 at C ≈ 5×10<sup>-3</sup> mol/L, were introduced in quartz tube (4 mm interior diameter) and introduced into the sample holder of the Dewar. The oxygen free decay curve measurements were recorded at 293 K for acetonitrile solutions of the complex (C ≈ 10<sup>-5</sup> mol/L). Aerated solutions were prepared by using no-degassed water as solvent. All emission quantum yields were measured according to the relative method using the reported [Cr(ddpd)<sub>2</sub>]<sup>3+</sup> ( $\Phi_{Cr}^L$  = 12.1%;  $\lambda_{exc}$  = 435 nm). The measurement was carried out by following the previously reported method (IUPAC Technical Report).<sup>S4</sup> The measurements were achieved in CH<sub>3</sub>CN, at room temperature and  $\lambda_{exc}$  = 435 nm (manifold Cr(<sup>4</sup>T<sub>2</sub>←<sup>4</sup>A<sub>2</sub>)/LMCT). Molar concentrations were adjusted to 1×10<sup>-5</sup> M.

**X-Ray Crystallography.**

Summary of crystal data, intensity measurements and structure refinements for *rac*-[Cr(dqp)(tpy)](PF<sub>6</sub>)<sub>3</sub>, *rac*-[Cr(ddpd)(dqp)](CF<sub>3</sub>SO<sub>3</sub>)<sub>3</sub> and *rac*-[Cr(dqp)(dqpOMe)](CF<sub>3</sub>SO<sub>3</sub>)<sub>3</sub> compound were collected in Tables S1-S12 (ESI). The crystals were mounted on MiTeGen cryoloops with protection oil. X-ray data collections were performed with an Agilent SuperNova Dual diffractometer equipped with a CCD Atlas detector (Cu[K $\alpha$ ] radiation) or a Rigaku synergy S equipped with an hypix detector. The structures were solved in SHELXT by using dual space methods.<sup>S5</sup> Full-matrix least-square refinements on  $F^2$  were performed with SHELXL<sup>S6</sup> within the Olex2 program.<sup>S7</sup> CCDC 2015187-2015190 contain the supplementary crystallographic data. The cif files can be obtained free of charge on [www.ccdc.cam.ac.uk](http://www.ccdc.cam.ac.uk).

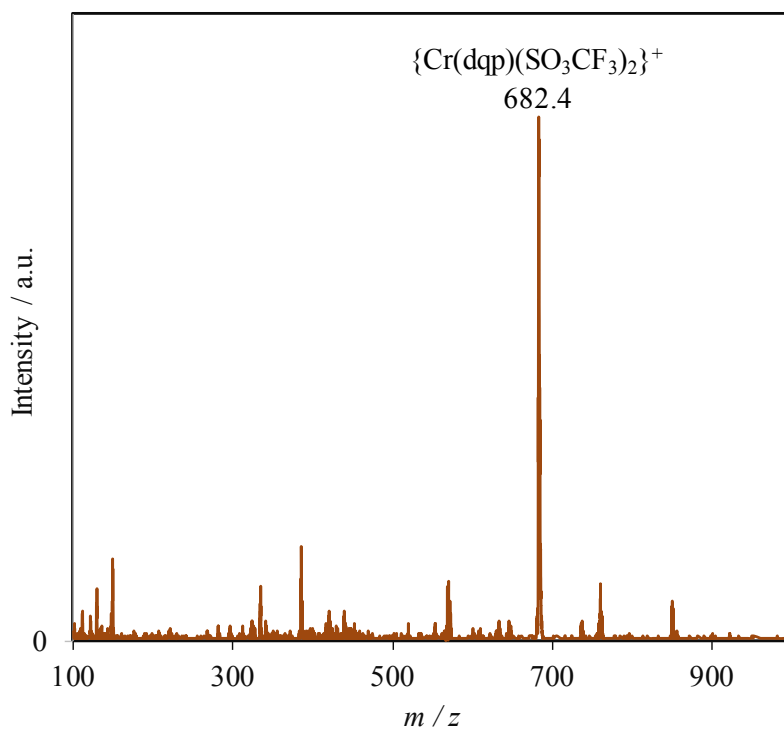

**Figure S1.** ESI-MS spectra recorded upon reaction of [Cr(dqp)Cl<sub>3</sub>] with AgCF<sub>3</sub>SO<sub>3</sub>

**Table S1.** Crystal data and structure refinement for *rac*-[Cr(dqp)Cl<sub>3</sub>]

|                                             |                                                                  |
|---------------------------------------------|------------------------------------------------------------------|
| Empirical formula                           | C <sub>23</sub> H <sub>15</sub> Cl <sub>3</sub> CrN <sub>3</sub> |
| Formula weight                              | 491.73                                                           |
| Temperature/K                               | 150(2)                                                           |
| Crystal system                              | monoclinic                                                       |
| Space group                                 | C2/c                                                             |
| a/Å                                         | 12.5368(2)                                                       |
| b/Å                                         | 12.0583(2)                                                       |
| c/Å                                         | 13.3923(2)                                                       |
| α/°                                         | 90                                                               |
| β/°                                         | 103.770(2)                                                       |
| γ/°                                         | 90                                                               |
| Volume/Å <sup>3</sup>                       | 1966.36(6)                                                       |
| Z                                           | 4                                                                |
| ρ <sub>calc</sub> /g/cm <sup>3</sup>        | 1.661                                                            |
| μ/mm <sup>-1</sup>                          | 8.669                                                            |
| F(000)                                      | 996.0                                                            |
| Crystal size/mm <sup>3</sup>                | 0.229 × 0.156 × 0.126                                            |
| Radiation                                   | CuKα (λ = 1.54184)                                               |
| 2θ range for data collection/°              | 10.324 to 148.778                                                |
| Index ranges                                | -15 ≤ h ≤ 15, -15 ≤ k ≤ 14, -16 ≤ l ≤ 16                         |
| Reflections collected                       | 29407                                                            |
| Independent reflections                     | 2005 [R <sub>int</sub> = 0.0284, R <sub>sigma</sub> = 0.0088]    |
| Data/restraints/parameters                  | 2005/0/138                                                       |
| Goodness-of-fit on F <sup>2</sup>           | 1.074                                                            |
| Final R indexes [I ≥ 2σ (I)]                | R <sub>1</sub> = 0.0230, wR <sub>2</sub> = 0.0686                |
| Final R indexes [all data]                  | R <sub>1</sub> = 0.0232, wR <sub>2</sub> = 0.0688                |
| Largest diff. peak/hole / e Å <sup>-3</sup> | 0.32/-0.41                                                       |

**Table S2.** Selected bond distances (Å), bond angles (°) in *rac*-[Cr(dqp)Cl<sub>3</sub>]

| <b>Atom</b> | <b>Atom</b> | <b>Length/Å</b> |
|-------------|-------------|-----------------|
| Cr1         | Cl1         | 2.3559(5)       |
| Cr1         | Cl2*        | 2.3251(3)       |
| Cr1         | Cl2         | 2.3250(3)       |
| Cr1         | N1*         | 2.0770(13)      |
| Cr1         | N1          | 2.0770(13)      |
| Cr1         | N2          | 2.0587(17)      |

  

| <b>Atom</b> | <b>Atom</b> | <b>Atom</b> | <b>Angle/°</b> |
|-------------|-------------|-------------|----------------|
| Cl2*        | Cr1         | Cl1         | 89.108(10)     |
| Cl2         | Cr1         | Cl1         | 89.107(10)     |
| Cl2         | Cr1         | Cl2*        | 178.21(2)      |
| N1          | Cr1         | Cl1         | 93.09(3)       |
| N1*         | Cr1         | Cl1         | 93.09(3)       |
| N1*         | Cr1         | Cl2         | 91.51(4)       |
| N1          | Cr1         | Cl2         | 88.59(4)       |
| N1*         | Cr1         | Cl2*        | 88.58(4)       |
| N1          | Cr1         | Cl2*        | 91.51(4)       |
| N1          | Cr1         | N1*         | 173.81(7)      |
| N2          | Cr1         | Cl1         | 180            |
| N2          | Cr1         | Cl2         | 90.893(10)     |
| N2          | Cr1         | Cl2*        | 90.892(10)     |
| N2          | Cr1         | N1*         | 86.91(3)       |
| N2          | Cr1         | N1          | 86.91(3)       |

**Table S3.** Interplanar angles (°) in *rac*-[Cr(dqp)Cl<sub>3</sub>]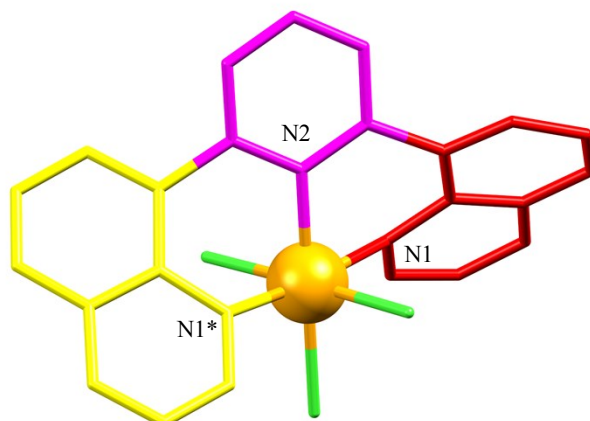

| Plane                                                                                                                                                                                          | mean deviation in Å | max deviation in Å (atom) |
|------------------------------------------------------------------------------------------------------------------------------------------------------------------------------------------------|---------------------|---------------------------|
| <i>QUIN1</i> N1 C5 C9 C8 C7 C6<br>C4 C3 C2 C1 <span style="background-color: yellow; border: 1px solid black; display: inline-block; width: 1em; height: 1em; vertical-align: middle;"></span> | 0.086               | 0.146 (C9)                |
| <i>PYR1</i> N2 C10 C11 C12 C11<br>C10 <span style="background-color: magenta; border: 1px solid black; display: inline-block; width: 1em; height: 1em; vertical-align: middle;"></span>        | 0.001               | 0.002 (C11)               |

**Interplanar angles (°)**

|       | PYR1 | QUIN1* |
|-------|------|--------|
| QUIN1 | 38.9 | 77.8   |
| PYR1  |      | 38.9   |

QUIN1\* is obtained from QUIN1 by applying the symmetry operation (1-X,Y,3/2-Z)

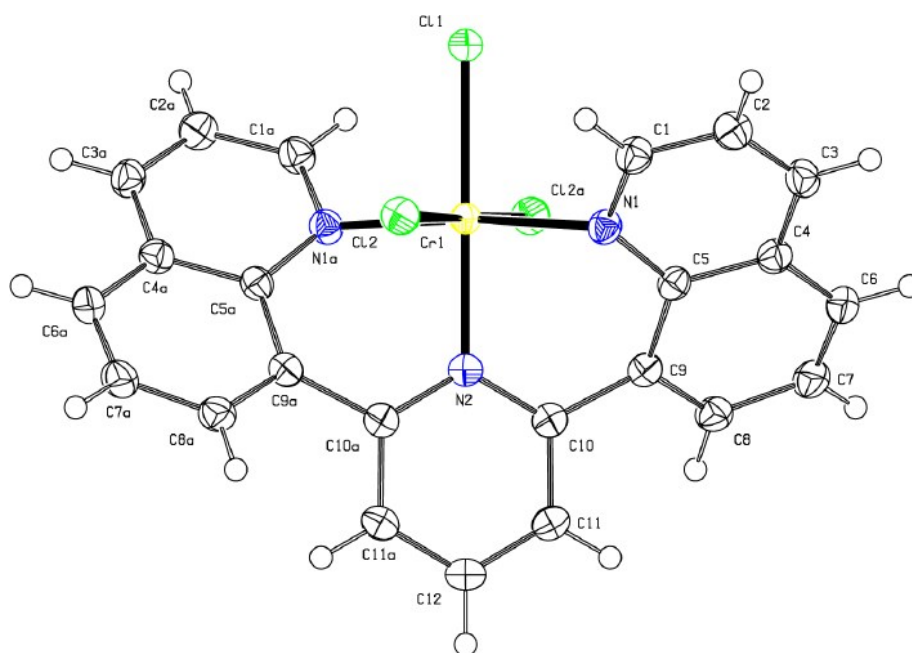

**Figure S2** ORTEP view of [Cr(dqp)Cl<sub>3</sub>](PF<sub>6</sub>)<sub>3</sub> (**1**) with numbering scheme. Thermal ellipsoids are drawn at 50% probability level.



**Table S4.** Crystal data and structure refinement for *rac*-[Cr(dqp)(tpy)](PF<sub>6</sub>)<sub>3</sub>.

|                                             |                                                                                                                              |
|---------------------------------------------|------------------------------------------------------------------------------------------------------------------------------|
| Empirical formula                           | C <sub>42.17</sub> H <sub>32</sub> CrF <sub>17.48</sub> N <sub>8</sub> O <sub>0.52</sub> P <sub>2.83</sub> S <sub>0.17</sub> |
| Formula weight                              | 1136.37                                                                                                                      |
| Temperature/K                               | 149.99(10)                                                                                                                   |
| Crystal system                              | orthorhombic                                                                                                                 |
| Space group                                 | Pbca                                                                                                                         |
| a/Å                                         | 17.10349(6)                                                                                                                  |
| b/Å                                         | 17.98863(8)                                                                                                                  |
| c/Å                                         | 28.79512(12)                                                                                                                 |
| α/°                                         | 90                                                                                                                           |
| β/°                                         | 90                                                                                                                           |
| γ/°                                         | 90                                                                                                                           |
| Volume/Å <sup>3</sup>                       | 8859.35(6)                                                                                                                   |
| Z                                           | 8                                                                                                                            |
| ρ <sub>calc</sub> /g/cm <sup>3</sup>        | 1.704                                                                                                                        |
| μ/mm <sup>-1</sup>                          | 4.261                                                                                                                        |
| F(000)                                      | 4574.0                                                                                                                       |
| Crystal size/mm <sup>3</sup>                | 0.319 × 0.243 × 0.189                                                                                                        |
| Radiation                                   | Cu Kα (λ = 1.54184)                                                                                                          |
| 2θ range for data collection/°              | 6.138 to 148.854                                                                                                             |
| Index ranges                                | -21 ≤ h ≤ 18, -22 ≤ k ≤ 20, -35 ≤ l ≤ 35                                                                                     |
| Reflections collected                       | 95378                                                                                                                        |
| Independent reflections                     | 8997 [R <sub>int</sub> = 0.0245, R <sub>sigma</sub> = 0.0096]                                                                |
| Data/restraints/parameters                  | 8997/137/712                                                                                                                 |
| Goodness-of-fit on F <sup>2</sup>           | 1.040                                                                                                                        |
| Final R indexes [I ≥ 2σ (I)]                | R <sub>1</sub> = 0.0452, wR <sub>2</sub> = 0.1200                                                                            |
| Final R indexes [all data]                  | R <sub>1</sub> = 0.0459, wR <sub>2</sub> = 0.1206                                                                            |
| Largest diff. peak/hole / e Å <sup>-3</sup> | 1.59/-0.75                                                                                                                   |

**Table S5.** Selected bond distances (Å), bond angles (°) in *rac*-[Cr(dqp)(tpy)](PF<sub>6</sub>)<sub>3</sub>.

| <b>Atom</b> | <b>Atom</b> | <b>Length/Å</b> |
|-------------|-------------|-----------------|
| Cr1         | N2 (dqp)    | 2.0272(18)      |
| Cr1         | N1 (dqp)    | 2.0611(18)      |
| Cr1         | N5 (tpy)    | 1.9894(19)      |
| Cr1         | N6 (tpy)    | 2.0685(18)      |
| Cr1         | N4 (tpy)    | 2.0832(18)      |
| Cr1         | N3 (dqp)    | 2.0725(19)      |

  

| <b>Atom</b> | <b>Atom</b> | <b>Atom</b> | <b>Angle/°</b> |
|-------------|-------------|-------------|----------------|
| N2          | Cr1         | N1          | 88.57(7)       |
| N2          | Cr1         | N6          | 97.09(7)       |
| N2          | Cr1         | N4          | 106.21(7)      |
| N2          | Cr1         | N3          | 90.60(7)       |
| N1          | Cr1         | N6          | 93.35(7)       |
| N1          | Cr1         | N4          | 89.70(7)       |
| N1          | Cr1         | N3          | 176.04(7)      |
| N5          | Cr1         | N2          | 175.35(7)      |
| N5          | Cr1         | N1          | 90.84(7)       |
| N5          | Cr1         | N6          | 78.33(7)       |
| N5          | Cr1         | N4          | 78.41(8)       |
| N5          | Cr1         | N3          | 90.29(8)       |
| N6          | Cr1         | N4          | 156.58(7)      |
| N6          | Cr1         | N3          | 90.59(7)       |
| N3          | Cr1         | N4          | 86.81(7)       |

**Table S6.** Interplanar angles (°) in *rac*-[Cr(dqp)(tpy)](PF<sub>6</sub>)<sub>3</sub>

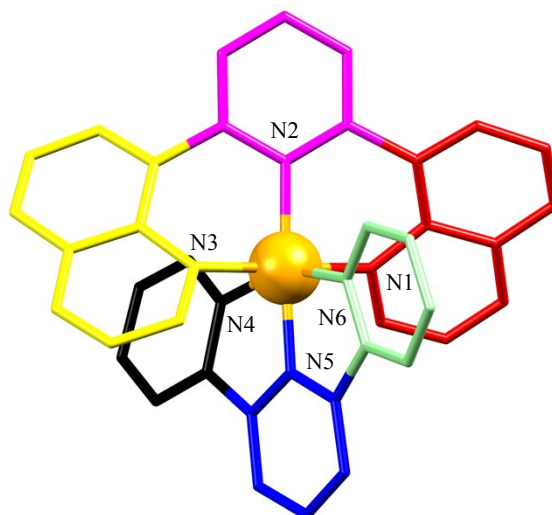

| Plane                                                                                      | mean deviation in Å | max deviation in Å (atom) |
|--------------------------------------------------------------------------------------------|---------------------|---------------------------|
| <b>QUIN1</b> N1 C1 C2 C3 C4 C5<br>C9 C8 C7 C6 <span style="color:red">■</span>             | 0.078               | 0.137 (C9)                |
| <b>PYR1</b> N2 C10 C11 C12 C13<br>C14 <span style="color:pink">■</span>                    | 0.021               | 0.030 (C14)               |
| <b>QUIN2</b> N3 C23 C22 C21 C19<br>C20 C15 C16 C17 C18 <span style="color:yellow">■</span> | 0.069               | 0.125 (N3)                |
| <b>PYR2</b> N4 C28 C27 C26 C25<br>C24 <span style="color:black">■</span>                   | 0.016               | 0.024 (N4)                |
| <b>PYR3</b> C29 C30 C31 C32 C33<br>N5 <span style="color:blue">■</span>                    | 0.014               | 0.020 (N5)                |
| <b>PYR4</b> N6 C34 C35 C36 C37<br>C38 <span style="color:green">■</span>                   | 0.006               | 0.010 (N6)                |

## Interplanar Angles (°)

|       | PYR1 | QUIN2 | PYR2 | PYR3 | PYR4 |
|-------|------|-------|------|------|------|
| QUIN1 | 27.6 | 71.8  | 69.1 | 59.8 | 64.4 |
| PYR1  |      | 44.3  | 53.9 | 50.7 | 59.4 |
| QUIN2 |      |       | 44.2 | 53.7 | 63.2 |
| PYR2  |      |       |      | 13.6 | 20.1 |
| PYR3  |      |       |      |      | 10.2 |

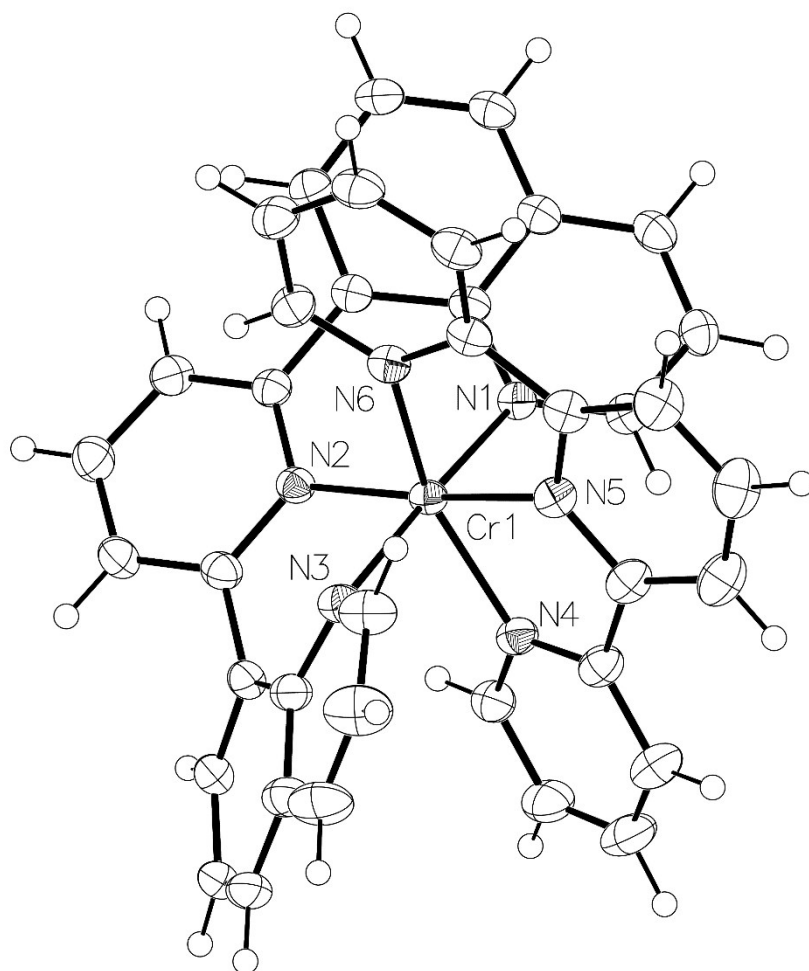

**Figure S3** ORTEP view of [Cr(dqp)(tpy)](PF<sub>6</sub>)<sub>3</sub> (**1**) with numbering scheme. Thermal ellipsoids are drawn at 50% probability level. Counter ions are omitted for clarity.

**Table S7.** Crystal data and structure refinement for *rac*-[Cr(ddpd)(dqp)](CF<sub>3</sub>SO<sub>3</sub>)<sub>3</sub>

|                                    |                                                                                  |
|------------------------------------|----------------------------------------------------------------------------------|
| Empirical formula                  | C <sub>44</sub> H <sub>38</sub> CrF <sub>18</sub> N <sub>10</sub> P <sub>3</sub> |
| Formula weight                     | 1193.75                                                                          |
| Temperature/K                      | 149.99(10)                                                                       |
| Crystal system                     | monoclinic                                                                       |
| Space group                        | P2 <sub>1</sub> /c                                                               |
| a/Å                                | 21.14124(15)                                                                     |
| b/Å                                | 22.83951(17)                                                                     |
| c/Å                                | 20.55852(15)                                                                     |
| α/°                                | 90                                                                               |
| β/°                                | 90.3997(7)                                                                       |
| γ/°                                | 90                                                                               |
| Volume/Å <sup>3</sup>              | 9926.55(12)                                                                      |
| Z                                  | 8                                                                                |
| ρ <sub>calc</sub> /cm <sup>3</sup> | 1.598                                                                            |
| μ/mm <sup>-1</sup>                 | 3.837                                                                            |
| F(000)                             | 4824.0                                                                           |
| Crystal size/mm <sup>3</sup>       | 0.637 × 0.394 × 0.037                                                            |
| Radiation                          | Cu Kα (λ = 1.54184)                                                              |
| 2θ range for data collection/°     | 4.18 to 147.57                                                                   |
| Index ranges                       | -25 ≤ h ≤ 25, -27 ≤ k ≤ 25, -24 ≤ l ≤ 24                                         |
| Reflections collected              | 87579                                                                            |
| Independent reflections            | 18950 [R <sub>int</sub> = 0.0541, R <sub>sigma</sub> = 0.0346]                   |
| Data/restraints/parameters         | 18950/0/1377                                                                     |
| Goodness-of-fit on F <sup>2</sup>  | 1.065                                                                            |
| Final R indexes [I ≥ 2σ (I)]       | R <sub>1</sub> = 0.0542, wR <sub>2</sub> = 0.1505                                |
| Final R indexes [all data]         | R <sub>1</sub> = 0.0659, wR <sub>2</sub> = 0.1579                                |

**Table S8.** Interplanar angles ( $^{\circ}$ ) in *rac*-[Cr(ddpd)(dqp)](CF<sub>3</sub>SO<sub>3</sub>)<sub>3</sub>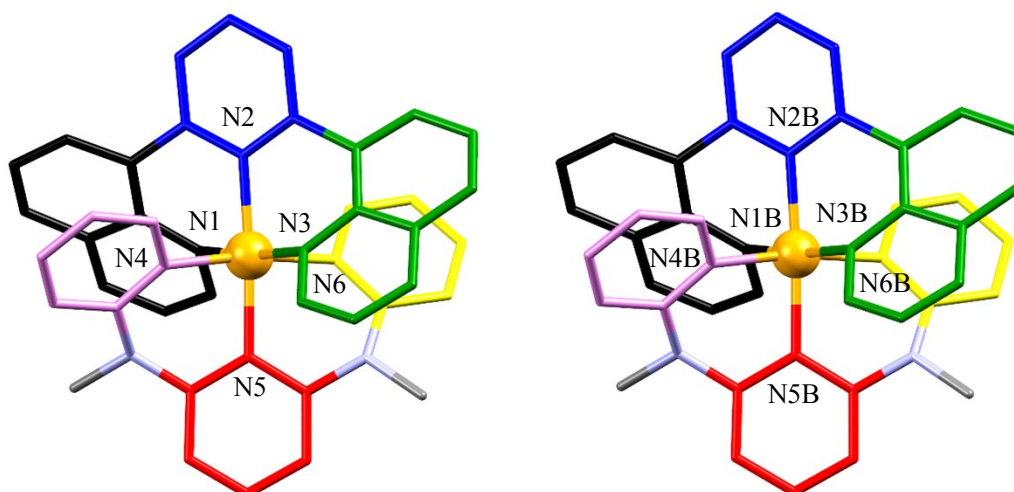

| Plane                                                  | mean deviation<br>in Å | max deviation in Å (atom) |
|--------------------------------------------------------|------------------------|---------------------------|
| N1 C1 C2 C3 C4 C5 C9 C8 C7 C6 <i>quin1</i>             | 0.077                  | 0.136 (N1)                |
| N1B C1B C2B C3B C4B C5B C9B C8B<br>C7B C6B             | 0.090                  | 0.153 (C9B)               |
| N2 C14 C13 C12 C11 C10 <i>pyr1</i>                     | 0.011                  | 0.016 (C14)               |
| N2B C14B C13B C12B C11B C10B                           | 0.006                  | 0.008 (C13B)              |
| N3 C23 C22 C21 C19 C20 C15 C16 C17<br>C18 <i>quin2</i> | 0.073                  | 0.137 (N3)                |
| C15B C16B C17B C18B C19B C21B<br>C22B C23B N3B C20B    | 0.065                  | 0.123 (N3B)               |
| N4 C24 C25 C26 C27 C28 <i>pyr2</i>                     | 0.022                  | 0.035 (N4)                |
| N4B C28B C27B C26B C25B C24B                           | 0.019                  | 0.030 (N4B)               |
| N5 C34 C33 C32 C31 C30 <i>pyr3</i>                     | 0.04                   | 0.005 (C34)               |
| N5B C30B C31B C32B C33B C34B                           | 0.004                  | 0.005 (N5B)               |
| N6 C36 C37 C38 C39 C40 <i>pyr4</i>                     | 0.026                  | 0.039 (N6)                |
| N6B C40B C39B C37B C38B C36B                           | 0.023                  | 0.037 (N6B)               |

Angles between least-square planes (in °). Two complexes are present in the asymmetric unit. Values for the second molecule are given in blue

|       | Pyr1 | Quin2 | Pyr2        | Pyr3 | Pyr4 |
|-------|------|-------|-------------|------|------|
| Quin1 | 36.7 | 74.7  | 32.0        | 41.6 | 84.2 |
|       | 38.3 | 77.0  | <u>31.4</u> | 46.1 | 85.9 |
| Pyr1  |      | 38.1  | 53.5        | 22.0 | 53.1 |
|       |      | 38.8  | <u>52.8</u> | 20.3 | 54.1 |
| Quin2 |      |       | 83.8        | 42.1 | 27.7 |
|       |      |       | 84.9        | 39.2 | 31.6 |
| Pyr2  |      |       |             | 41.6 | 77.9 |
|       |      |       |             | 45.7 | 76.7 |
| Pyr3  |      |       |             |      | 42.9 |
|       |      |       |             |      | 39.9 |

**Table S9.** Selected bond distances (Å), bond angles (°) in *rac*-[Cr(ddpd)(dqp)](CF<sub>3</sub>SO<sub>3</sub>)<sub>3</sub>

| <b>Atom</b> | <b>Atom</b> | <b>Length/Å</b> |
|-------------|-------------|-----------------|
| Cr1         | N1          | 2.052(2)        |
| Cr1         | N2          | 2.032(2)        |
| Cr1         | N3          | 2.051(2)        |
| Cr1         | N4          | 2.050(2)        |
| Cr1         | N5          | 2.041(2)        |
| Cr1         | N6          | 2.042(2)        |

  

| <b>Atom</b> | <b>Atom</b> | <b>Atom</b> | <b>Angle/°</b> |
|-------------|-------------|-------------|----------------|
| N2          | Cr1         | N1          | 88.27(9)       |
| N2          | Cr1         | N3          | 87.66(9)       |
| N2          | Cr1         | N4          | 93.04(9)       |
| N2          | Cr1         | N5          | 179.60(10)     |
| N2          | Cr1         | N6          | 93.68(9)       |
| N3          | Cr1         | N1          | 175.48(10)     |
| N4          | Cr1         | N1          | 93.69(9)       |
| N4          | Cr1         | N3          | 88.49(9)       |
| N5          | Cr1         | N1          | 91.37(10)      |
| N5          | Cr1         | N3          | 92.71(10)      |
| N5          | Cr1         | N4          | 86.83(9)       |
| N5          | Cr1         | N6          | 86.46(10)      |
| N6          | Cr1         | N1          | 87.42(10)      |
| N6          | Cr1         | N3          | 90.88(9)       |
| N6          | Cr1         | N4          | 173.22(9)      |



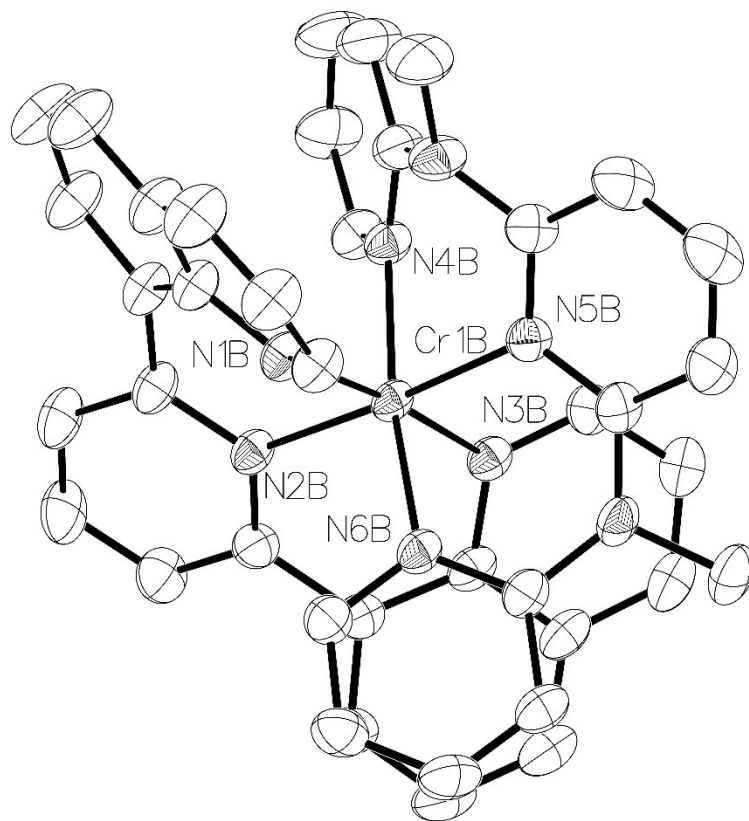

**Figure S4** ORTEP view of [Cr(ddpd)(dqp)](CF<sub>3</sub>SO<sub>3</sub>)<sub>3</sub> (**2**) with numbering scheme. Thermal ellipsoids are drawn at 50% probability level. Counter ions and H atoms are omitted for clarity.

**Table S10.** Crystal data and structure refinement for *rac*-[Cr(dqp)(dqpOMe)](CF<sub>3</sub>SO<sub>3</sub>)<sub>3</sub>

|                                             |                                                                                                |
|---------------------------------------------|------------------------------------------------------------------------------------------------|
| Empirical formula                           | C <sub>52</sub> H <sub>35</sub> CrF <sub>9</sub> N <sub>7</sub> O <sub>10</sub> S <sub>3</sub> |
| Formula weight                              | 1237.05                                                                                        |
| Temperature/K                               | 150.01(10)                                                                                     |
| Crystal system                              | triclinic                                                                                      |
| Space group                                 | P-1                                                                                            |
| a/Å                                         | 13.1076(5)                                                                                     |
| b/Å                                         | 13.8460(5)                                                                                     |
| c/Å                                         | 14.7792(5)                                                                                     |
| α/°                                         | 100.865(3)                                                                                     |
| β/°                                         | 90.278(3)                                                                                      |
| γ/°                                         | 108.118(3)                                                                                     |
| Volume/Å <sup>3</sup>                       | 2497.76(16)                                                                                    |
| Z                                           | 2                                                                                              |
| ρ <sub>calc</sub> /g/cm <sup>3</sup>        | 1.645                                                                                          |
| μ/mm <sup>-1</sup>                          | 3.975                                                                                          |
| F(000)                                      | 1258.0                                                                                         |
| Crystal size/mm <sup>3</sup>                | 0.522 × 0.286 × 0.164                                                                          |
| Radiation                                   | Cu Kα (λ = 1.54184)                                                                            |
| 2θ range for data collection/°              | 6.104 to 141.146                                                                               |
| Index ranges                                | -15 ≤ h ≤ 15, -16 ≤ k ≤ 16, -13 ≤ l ≤ 18                                                       |
| Reflections collected                       | 18796                                                                                          |
| Independent reflections                     | 9338 [R <sub>int</sub> = 0.0199, R <sub>sigma</sub> = 0.0215]                                  |
| Data/restraints/parameters                  | 9338/0/742                                                                                     |
| Goodness-of-fit on F <sup>2</sup>           | 1.041                                                                                          |
| Final R indexes [I ≥ 2σ (I)]                | R <sub>1</sub> = 0.0500, wR <sub>2</sub> = 0.1271                                              |
| Final R indexes [all data]                  | R <sub>1</sub> = 0.0516, wR <sub>2</sub> = 0.1283                                              |
| Largest diff. peak/hole / e Å <sup>-3</sup> | 1.85/-0.78                                                                                     |

**Table S11.** Selected bond distances (Å), bond angles (°) in *rac*-[Cr(dqp)(dqpOMe)](CF<sub>3</sub>SO<sub>3</sub>)<sub>3</sub>

| <b>Atom</b> | <b>Atom</b> | <b>Length/Å</b> |
|-------------|-------------|-----------------|
| Cr1         | N1          | 2.060(2)        |
| Cr1         | N2          | 2.054(2)        |
| Cr1         | N3          | 2.067(2)        |
| Cr1         | N4          | 2.070(2)        |
| Cr1         | N5          | 2.038(2)        |
| Cr1         | N6          | 2.058(2)        |

  

| <b>Atom</b> | <b>Atom</b> | <b>Atom</b> | <b>Angle/°</b> |
|-------------|-------------|-------------|----------------|
| N1          | Cr1         | N3          | 174.47(9)      |
| N1          | Cr1         | N4          | 92.67(8)       |
| N2          | Cr1         | N1          | 87.01(8)       |
| N2          | Cr1         | N3          | 87.47(9)       |
| N2          | Cr1         | N4          | 92.20(9)       |
| N2          | Cr1         | N6          | 94.02(8)       |
| N3          | Cr1         | N4          | 87.96(9)       |
| N5          | Cr1         | N1          | 92.23(8)       |
| N5          | Cr1         | N2          | 178.29(8)      |
| N5          | Cr1         | N3          | 93.30(9)       |
| N5          | Cr1         | N4          | 86.31(9)       |
| N5          | Cr1         | N6          | 87.48(8)       |
| N6          | Cr1         | N1          | 88.34(8)       |
| N6          | Cr1         | N3          | 91.64(9)       |
| N6          | Cr1         | N4          | 173.74(9)      |

**Table S12.** Interplanar angles (°) in *rac*-[Cr(dqp)(dqpOMe)](CF<sub>3</sub>SO<sub>3</sub>)<sub>3</sub>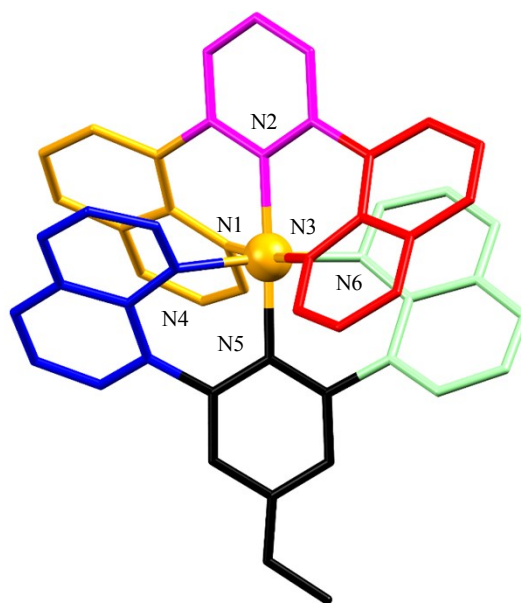

| Plane                                                                                       | mean deviation<br>in Å | max deviation in Å (atom) |
|---------------------------------------------------------------------------------------------|------------------------|---------------------------|
| <b>QUIN1</b> N1 C1 C2 C3 C4 C9<br>C8 C7 C6 C5 <span style="color: yellow;">■</span>         | 0.105                  | 0.170 (N1)                |
| <b>PYR1</b> N2 C14 C13 C12 C11 C10 <span style="color: magenta;">■</span>                   | 0.002                  | 0.004 (C11)               |
| <b>QUIN2</b> C15 C16 C17 C18 C19 C20 C21 C22<br>N3 C23 <span style="color: red;">■</span>   | 0.085                  | 0.142 (N3)                |
| <b>QUIN3</b> N4 C24 C25 C26 C27 C29 C30 C31<br>C32 C28 <span style="color: blue;">■</span>  | 0.092                  | 0.162 (N4)                |
| <b>PYR2</b> N5 C33 C34 C35 C38 C39 <span style="color: black;">■</span>                     | 0.009                  | 0.013 (C35)               |
| <b>QUIN4</b> N6 C48 C40 C41 C42 C43 C44 C45<br>C46 C47 <span style="color: green;">■</span> | 0.092                  | 0.157 (C40)               |

Interplanar angle (°)

|       | PYR1 | QUIN2 | QUIN3 | PYR2 | QUIN4 |
|-------|------|-------|-------|------|-------|
| QUIN1 | 40.1 | 79.4  | 11.8  | 41.5 | 83.3  |
| PYR1  |      | 39.5  | 41.6  | 17.1 | 45.5  |
| QUIN2 |      |       | 80.6  | 45.6 | 20.9  |
| QUIN3 |      |       |       | 37.6 | 80.1  |
| PYR2  |      |       |       |      | 42.6  |

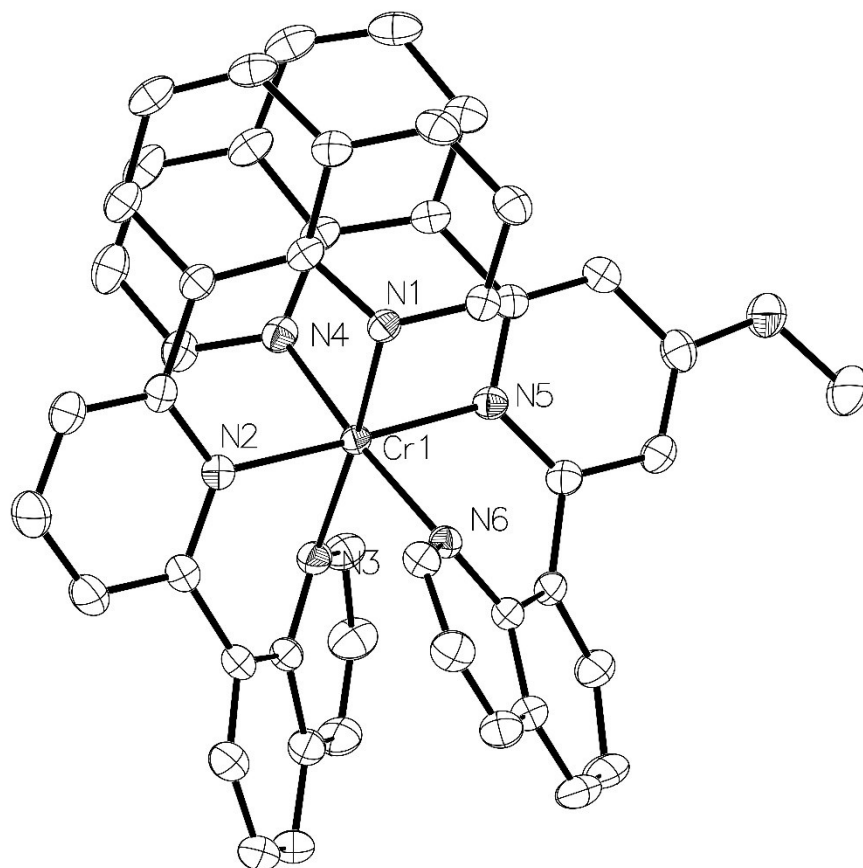

**Figure S5** ORTEP view of  $[\text{Cr}(\text{dqp})(\text{dqpOMe})](\text{CF}_3\text{SO}_3)_3$  (**3**) with numbering scheme. Thermal ellipsoids are drawn at 50% probability level. Counter ions and H atoms are omitted for clarity.

**Table S13.** Selected transitions of absorption spectra recorded for **1**, **2**, **3** in CH<sub>3</sub>CN at 10<sup>-4</sup> M between 250-650 nm and at *circa* 1 mM between 650-850 nm at 293 K.

| Compound                        | $\lambda$ (nm) | $\nu$ (cm <sup>-1</sup> ) | $\epsilon$ (M <sup>-1</sup> cm <sup>-1</sup> ) | Assignment                                   |
|---------------------------------|----------------|---------------------------|------------------------------------------------|----------------------------------------------|
| [Cr(dqp)(tpy)] <sup>3+</sup>    | 280            | 35741                     | 29589                                          | $\pi^* \leftarrow \pi$                       |
|                                 | 311            | 32154                     | 26153                                          | $\pi^* \leftarrow \pi$                       |
|                                 | 358            | 27932                     | 12032                                          | $\pi^* \leftarrow \pi$                       |
|                                 | 400            | 25062                     | 4875                                           | LMCT/(MC)                                    |
|                                 | 472            | 21186                     | 634                                            | ${}^4T_2 \leftarrow {}^4A_2$                 |
|                                 | 680            | 14705                     | 0.08                                           | ${}^2T_{1'''}(C_2) \leftarrow {}^4A_2'(C_2)$ |
|                                 | 698            | 14326                     | 0.18                                           | ${}^2T_{1''}(C_2) \leftarrow {}^4A_2'(C_2)$  |
|                                 | 725            | 13779                     | 0.04                                           | ${}^2T_{1'}(C_2) \leftarrow {}^4A_2'(C_2)$   |
|                                 | 736            | 13586                     | 0.11                                           | ${}^2E''(C_2) \leftarrow {}^4A_2'(C_2)$      |
|                                 | 749            | 13351                     | 0.15                                           | ${}^2E'(C_2) \leftarrow {}^4A_2'(C_2)$       |
| [Cr(ddpd)(dqp)] <sup>3+</sup>   | 278            | 35971                     | 32589                                          | $\pi^* \leftarrow \pi$                       |
|                                 | 323            | 30959                     | 41616                                          | $\pi^* \leftarrow \pi$                       |
|                                 | 362            | 27624                     | 28173                                          | $\pi^* \leftarrow \pi$                       |
|                                 | 395            | 25316                     | 21015                                          | $\pi^* \leftarrow \pi$                       |
|                                 | 415            | 24096                     | <sup>a</sup>                                   | ${}^4T_2 \leftarrow {}^4A_2$                 |
|                                 | 453            | 22075                     | 3221                                           | LMCT/(MC)                                    |
|                                 | 696            | 14367                     | 0.15                                           | ${}^2T_{1'''}(C_2) \leftarrow {}^4A_2(C_2)$  |
|                                 | 719            | 13908                     | 0.07                                           | ${}^2T_{1''}(C_2) \leftarrow {}^4A_2(C_2)$   |
|                                 | 732            | 13661                     | 0.30                                           | ${}^2T_{1'}(C_2) \leftarrow {}^4A_2(C_2)$    |
|                                 | 763            | 13097                     | 0.23                                           | ${}^2E'(C_2) \leftarrow {}^4A_2(C_2)$        |
| [Cr(dqp)(dqpOMe)] <sup>3+</sup> | 334            | 29940                     | 34427                                          | $\pi^* \leftarrow \pi$                       |
|                                 | 374            | 26737                     | 30974                                          | $\pi^* \leftarrow \pi$                       |
|                                 | 409            | 24449                     | <sup>a</sup>                                   | ${}^4T_2 \leftarrow {}^4A_2$                 |
|                                 | 467            | 21413                     | 700                                            | LMCT/(MC)                                    |
|                                 | 698            | 14326                     | 0.093                                          | ${}^2T_{1''}(C_2) \leftarrow {}^4A_2(C_2)$   |
|                                 | 727            | 13755                     | 0.34                                           | ${}^2T_{1'}(C_2) \leftarrow {}^4A_2(C_2)$    |
|                                 | 753            | 13280                     | 0.06                                           | ${}^2E'(C_2) \leftarrow {}^4A_2(C_2)$        |

<sup>a</sup> Not given because of the overlap with LMCT

**Table S14.** Energies of the Cr(<sup>4</sup>A<sub>2</sub>), Cr(<sup>2</sup>T<sub>1</sub>) and Cr(<sup>2</sup>E) levels and ligand field  $\Delta$  and Racah parameters  $B$  and  $C$  computed with eqs S1-S3 for [Cr(dqp)(tpy)]<sup>3+</sup> (1) [Cr(ddpd)(dqp)]<sup>3+</sup> (2) and [Cr(dqp)(dqpOMe)]<sup>3+</sup> in acetonitrile solution at 293 K.

Racah parameters  $B$  and  $C$  have been estimated with the help of eqs S1-S3.<sup>S8-S10</sup>

$$E(^4T_2) = \Delta \quad (S1)$$

$$E(^2T_1) = 9B + 3C - 24(B^2/\Delta) \quad (S2)$$

$$E(^2E) = 9B + 3C - 50(B^2/\Delta) \quad (S3)$$

| Compound                                           | $\Delta$<br>/cm <sup>-1</sup> | $B$<br>/cm <sup>-1</sup> | $C$<br>/cm <sup>-1</sup> | $\Delta/B$ | $C/B$ | <sup>2</sup> T <sub>2</sub><br>/cm <sup>-1<sup>b</sup></sup> | <sup>4</sup> T <sub>1</sub><br>/cm <sup>-1<sup>b</sup></sup> | Reference |
|----------------------------------------------------|-------------------------------|--------------------------|--------------------------|------------|-------|--------------------------------------------------------------|--------------------------------------------------------------|-----------|
| <b>1</b>                                           | 21186                         | 811                      | 2571                     | 26         | 3.2   | 19756                                                        | 33896                                                        | This work |
| <b>2</b>                                           | 24096                         | 779                      | 2492                     | 31         | 3.2   | 20490                                                        | 32077                                                        | This work |
| <b>3</b>                                           | 24449                         | 784                      | 2509                     | 31         | 3.2   | 20626                                                        | 31193                                                        | This work |
| [Cr(dqp) <sub>2</sub> ] <sup>3+</sup>              | 24937                         | 656                      | 2791                     | 38         | 4.3   | 20758                                                        | 32030                                                        | S11       |
| [Cr(ddpd) <sub>2</sub> ] <sup>3+<sup>b</sup></sup> | 22883                         | 763                      | 2442                     | 30         | 3.2   | 19176                                                        | 30828                                                        | S11       |

<sup>a</sup> The energy of Cr(<sup>2</sup>T<sub>1</sub>) is taken as the average of its split components (see text). <sup>b</sup> Computed using  $E(^2T_2) = 15B + 5C - 176(B^2/\Delta)$  and  $E(^4T_1) = 1.5\Delta + 7.5B - 0.5\sqrt{225B^2 + \Delta^2} - 18\Delta B$ .<sup>S8, S9</sup> <sup>b</sup> In water.

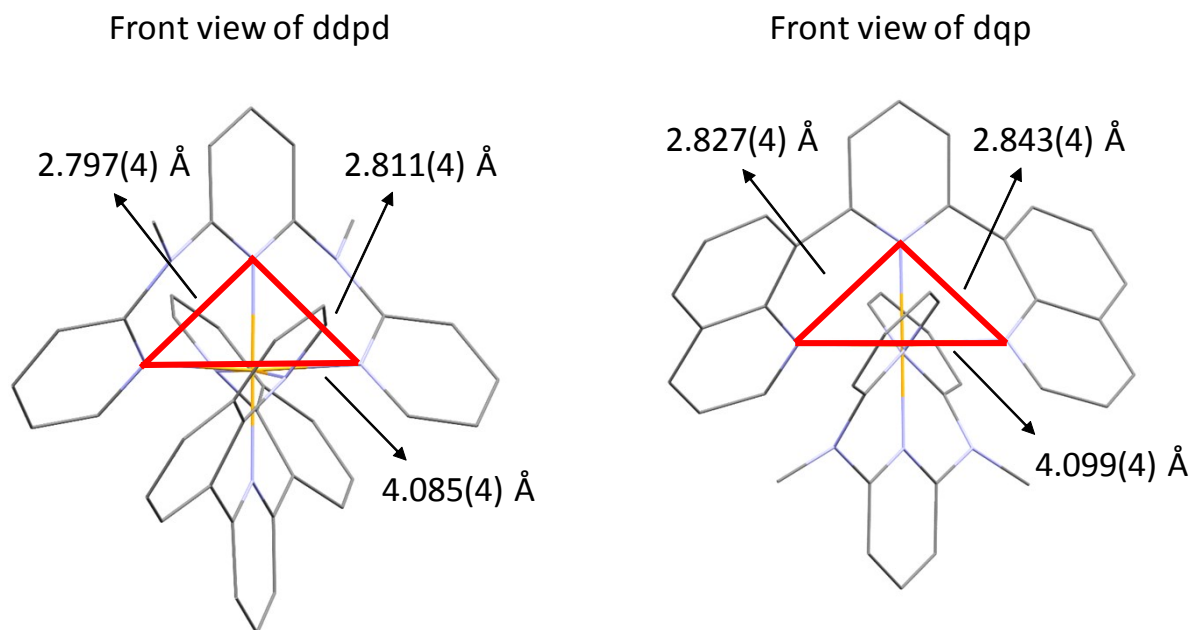

**Figure S6.** Calculated N(terminal)-N(central) and N(terminal)-N(terminal) distances for the bound ddpd (left) and (dqp) right in compound **2**.

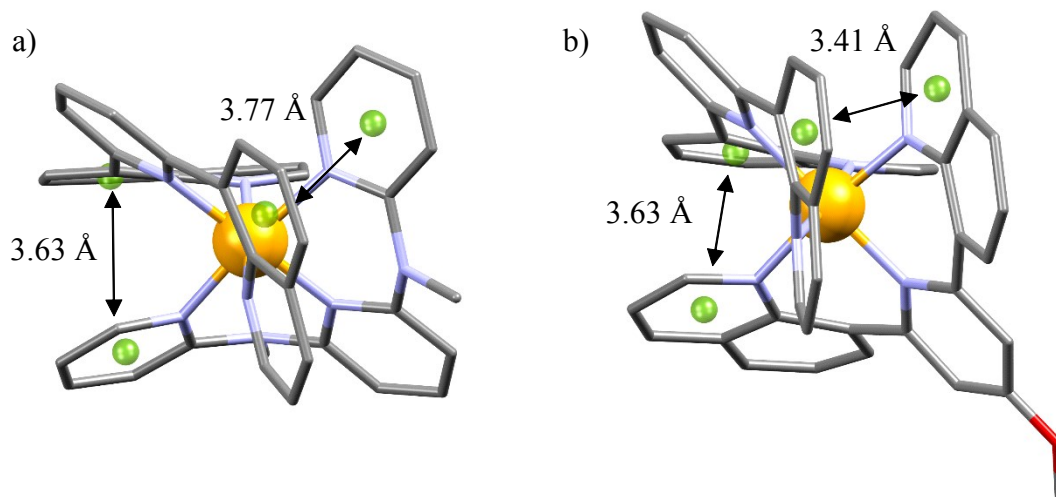

**Figure S7.** (a) Intramolecular interstrand  $\pi$ -stacking occurring between the quinoline rings and the amino-pyridine rings in **2** and (b) intramolecular interstrand stacking through  $\pi$  interaction involving quinoline rings in **3**. Colour code for the atoms: C (gray), N (blue), O (red) and Cr (orange). The centroids of the stacked aromatic planes are represented with green spheres.



a)

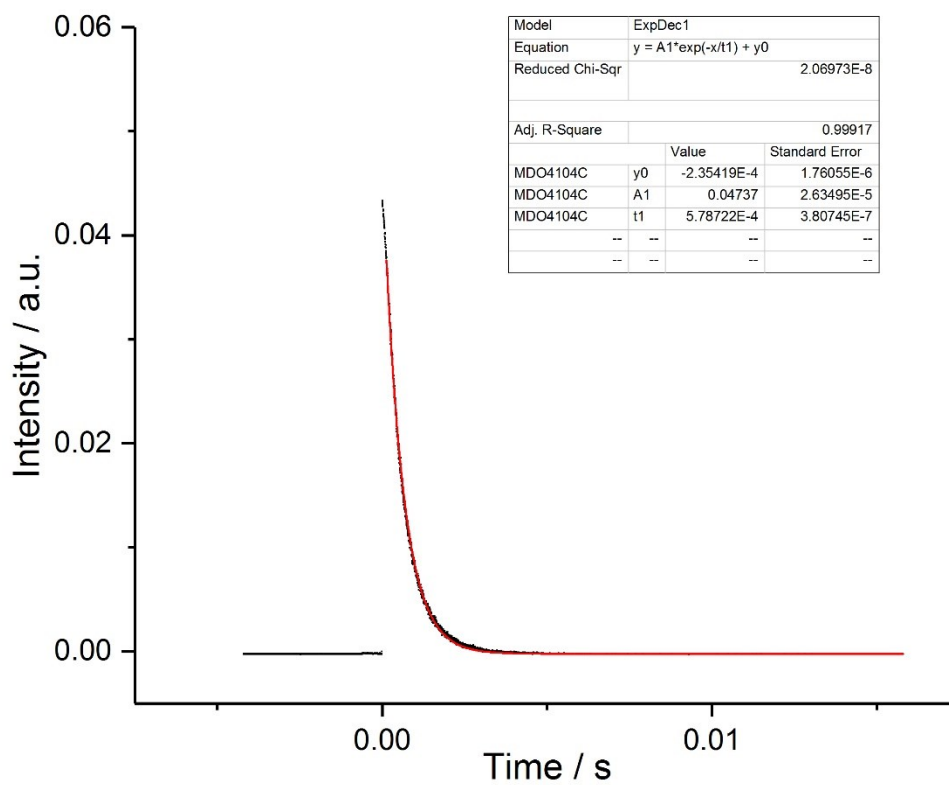

b)

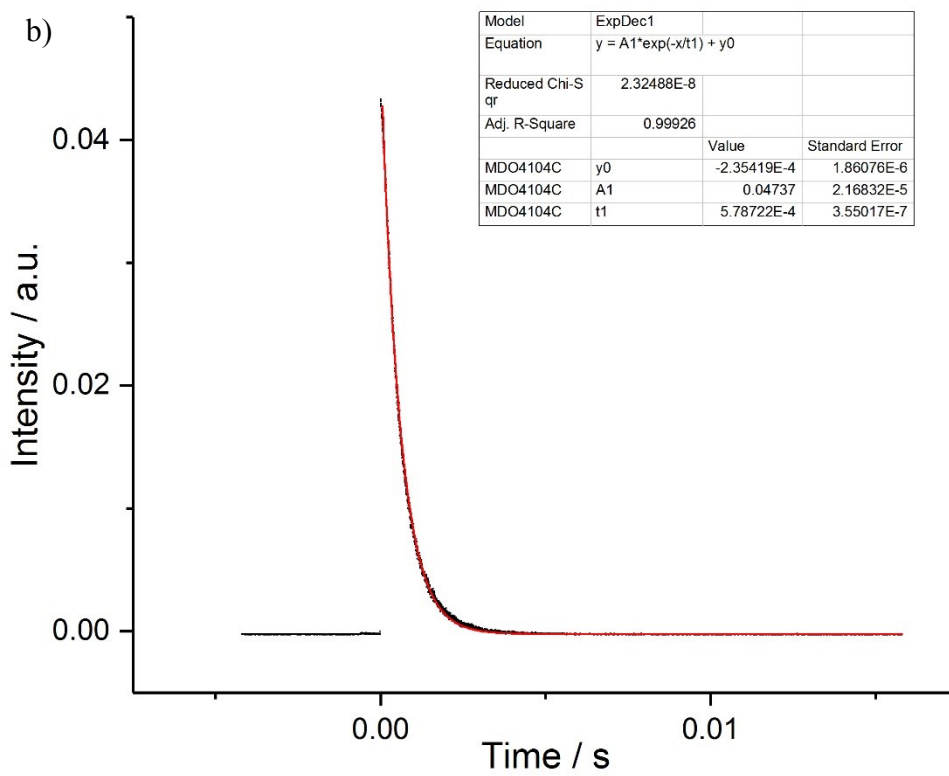

b

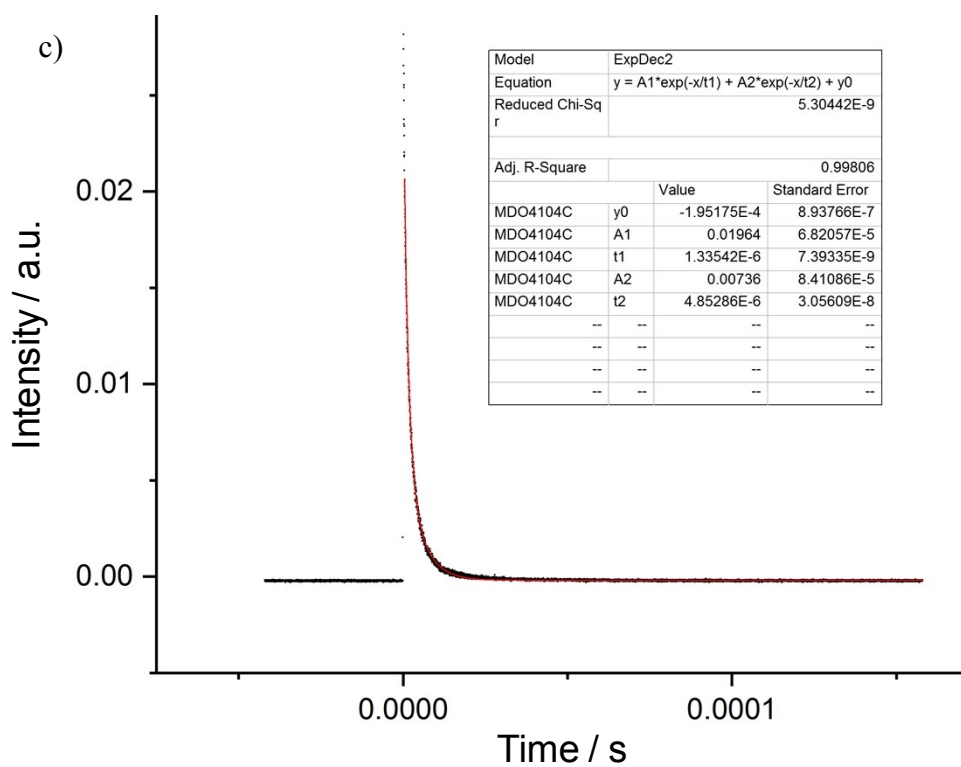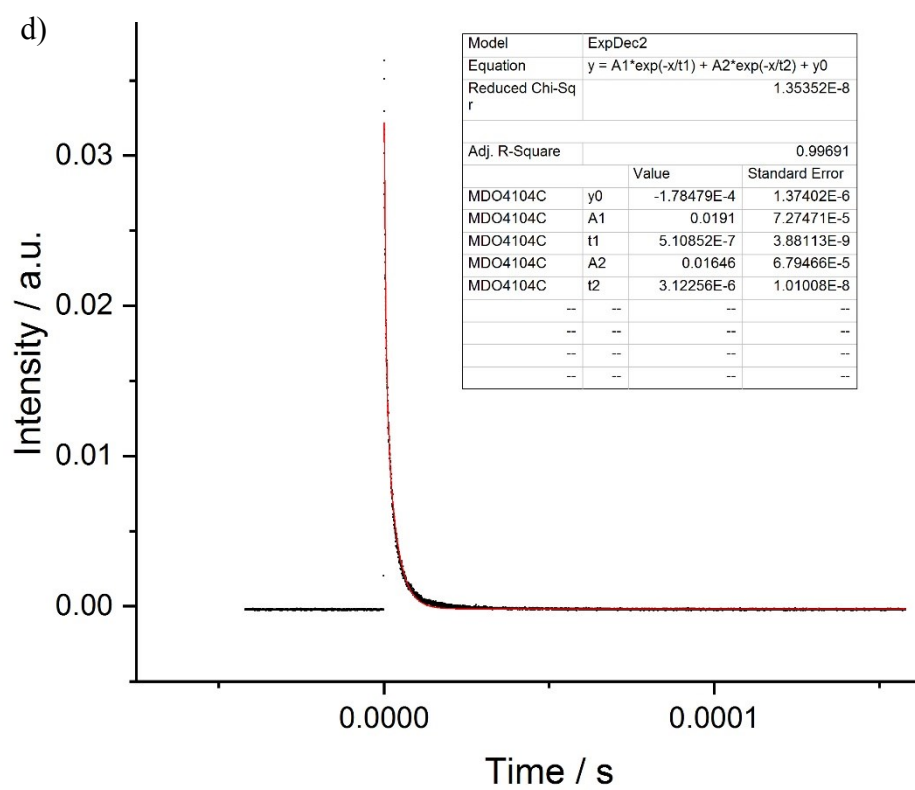

e)

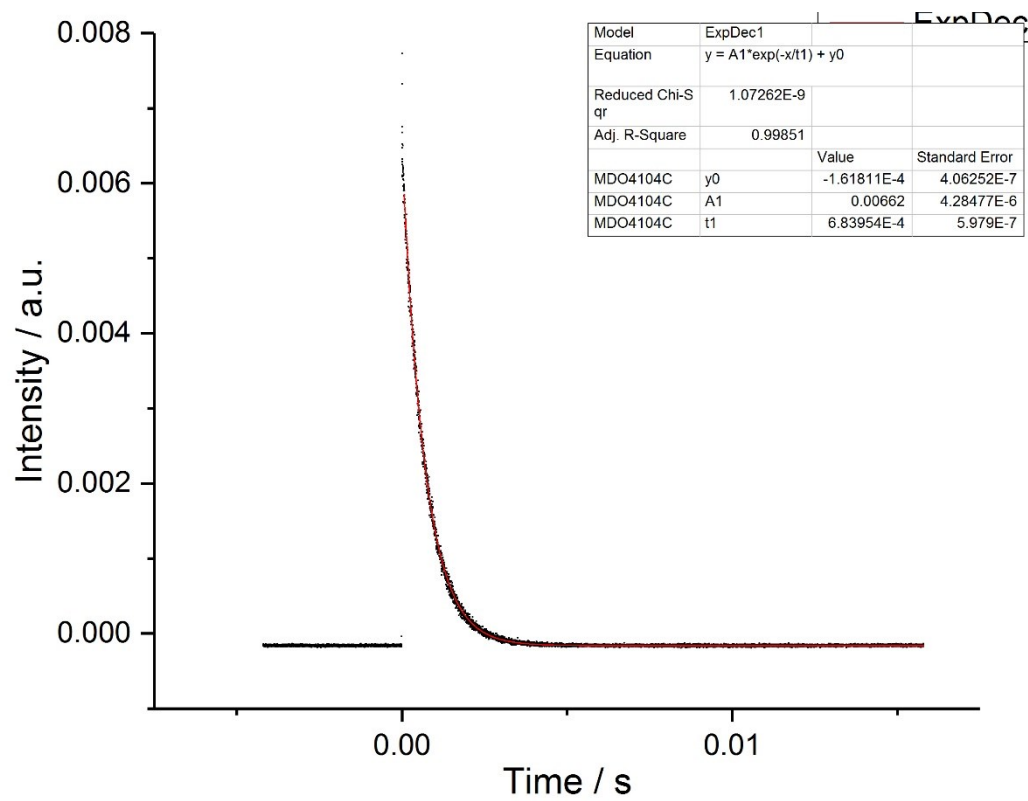

f)

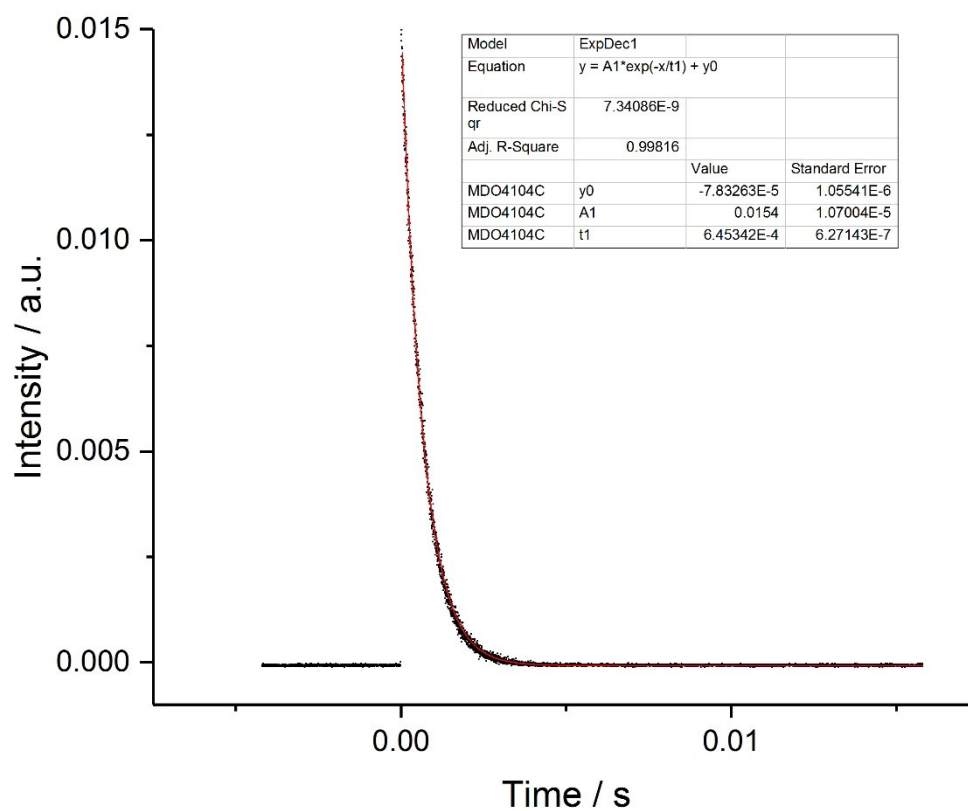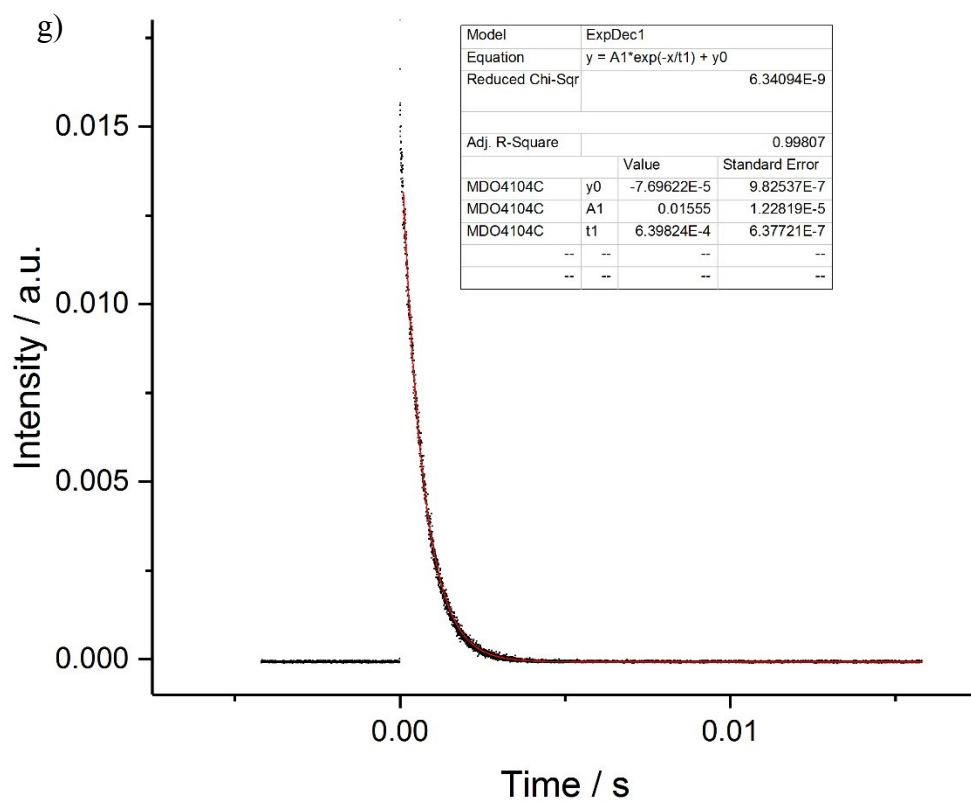

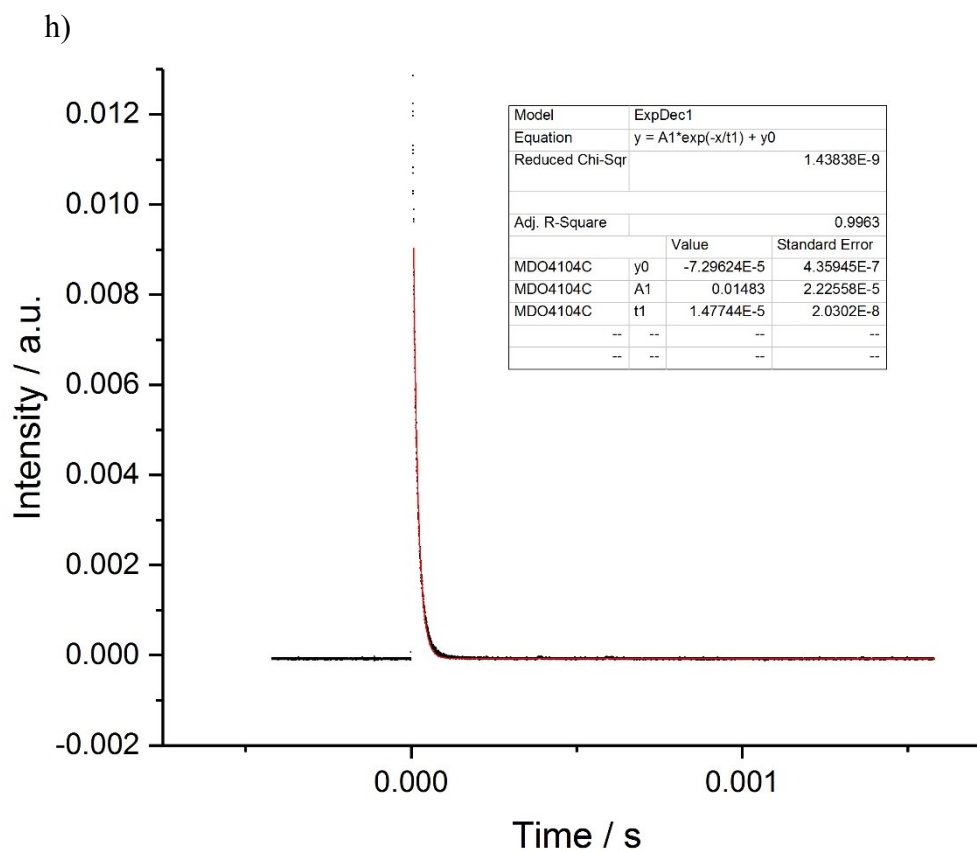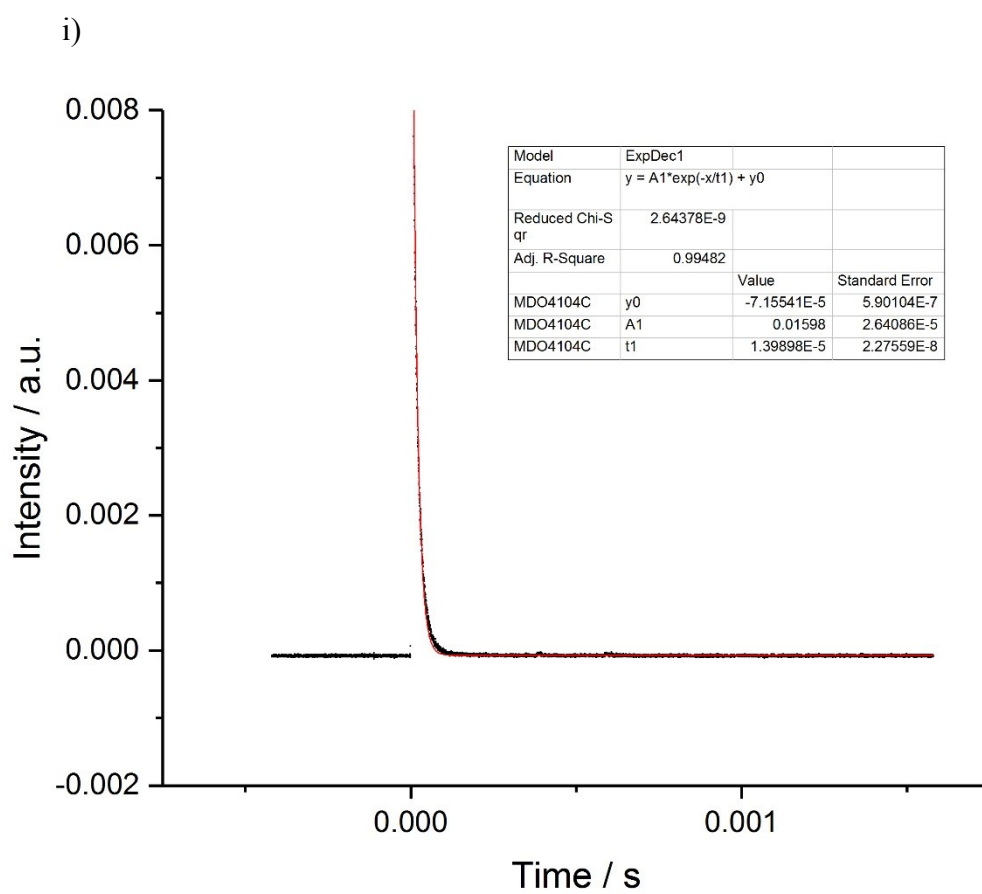

j)

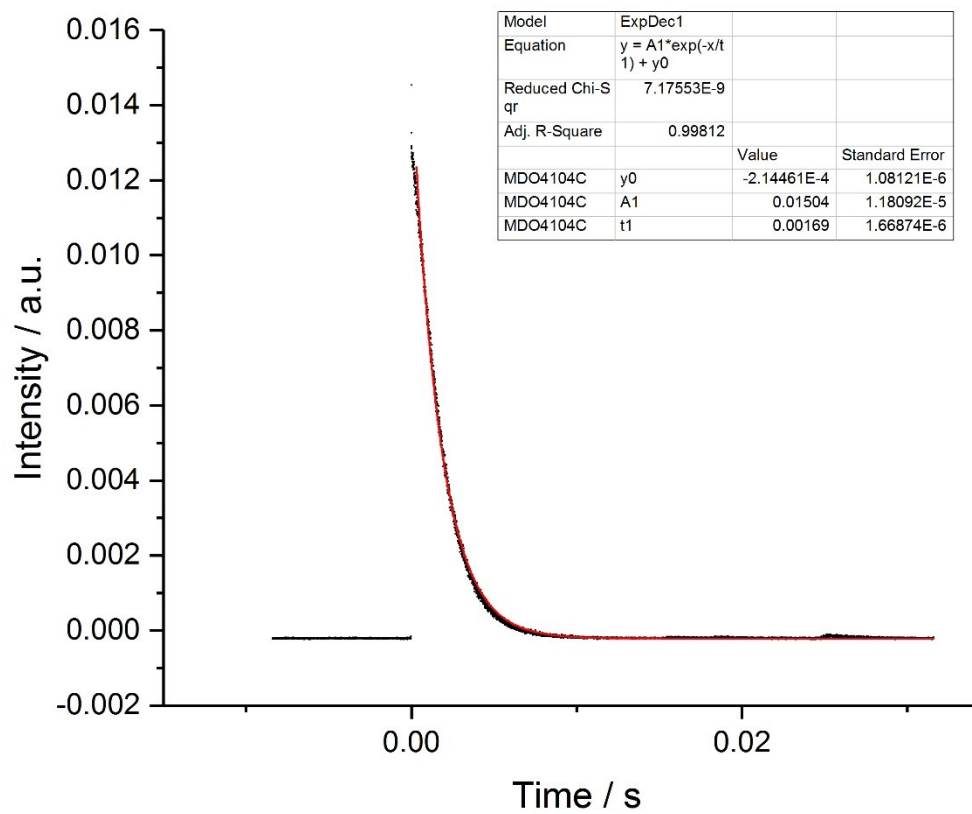

k)

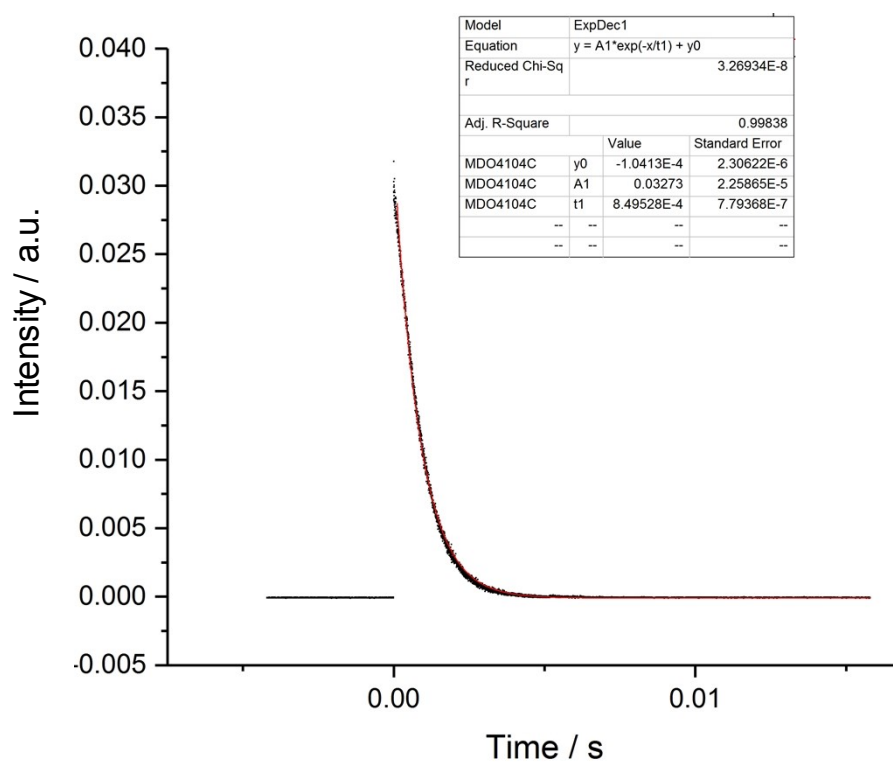

l)

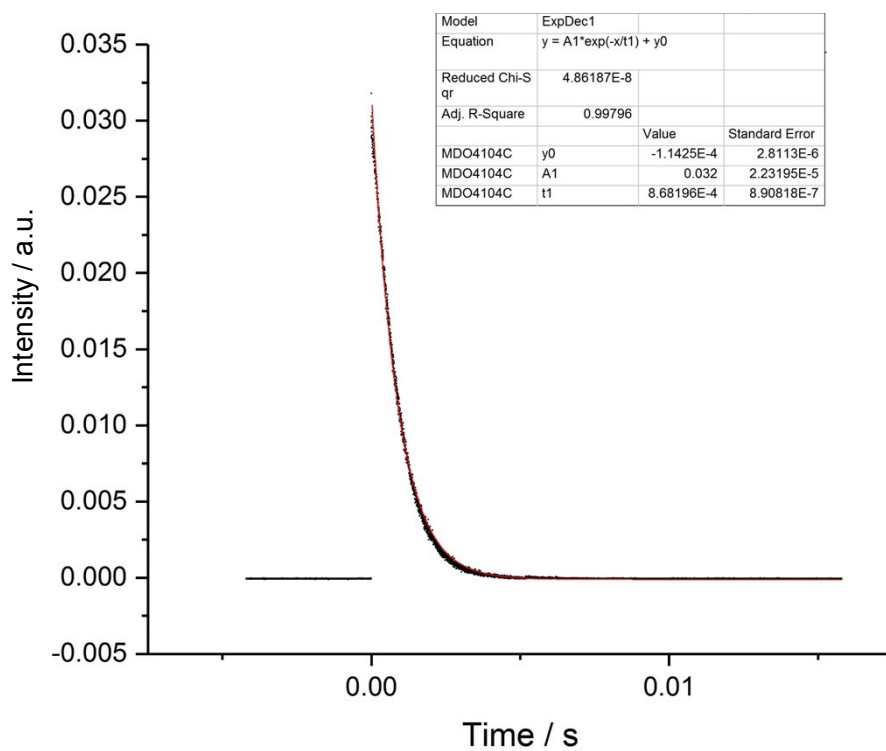

m)

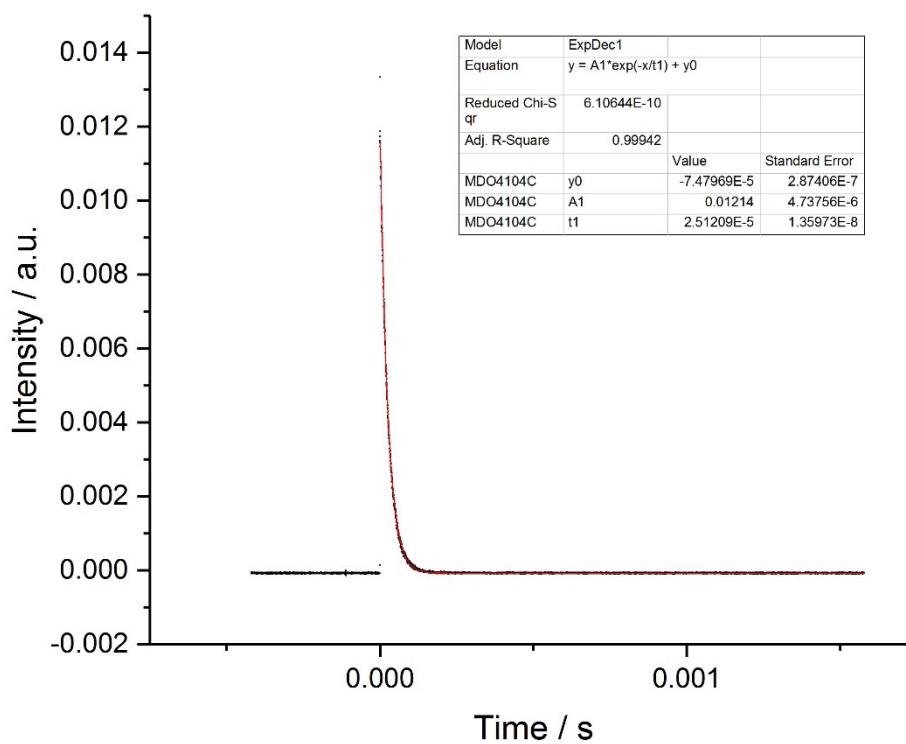

n)

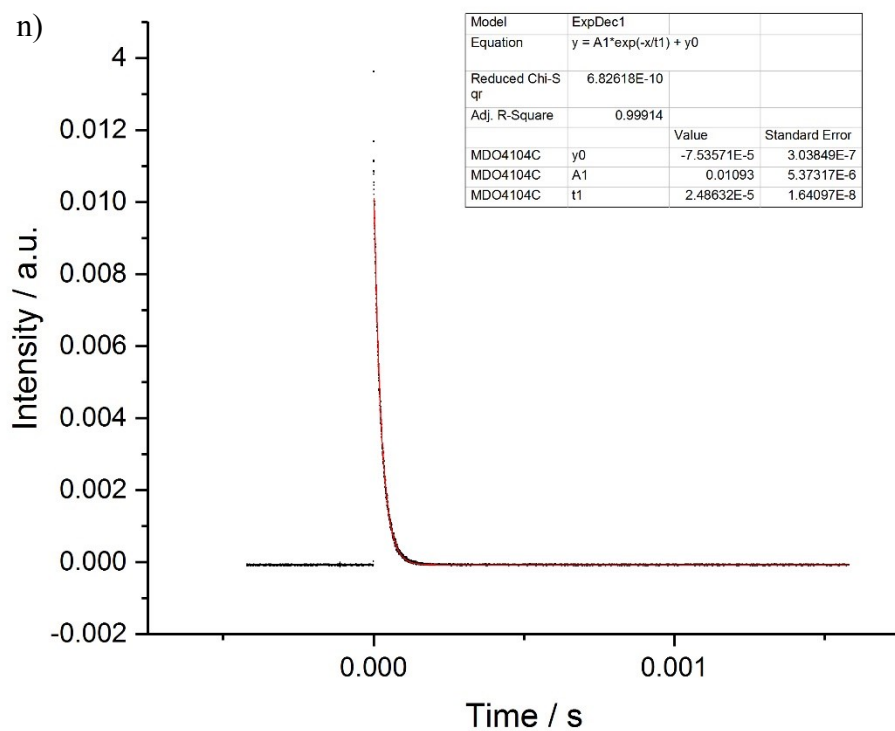



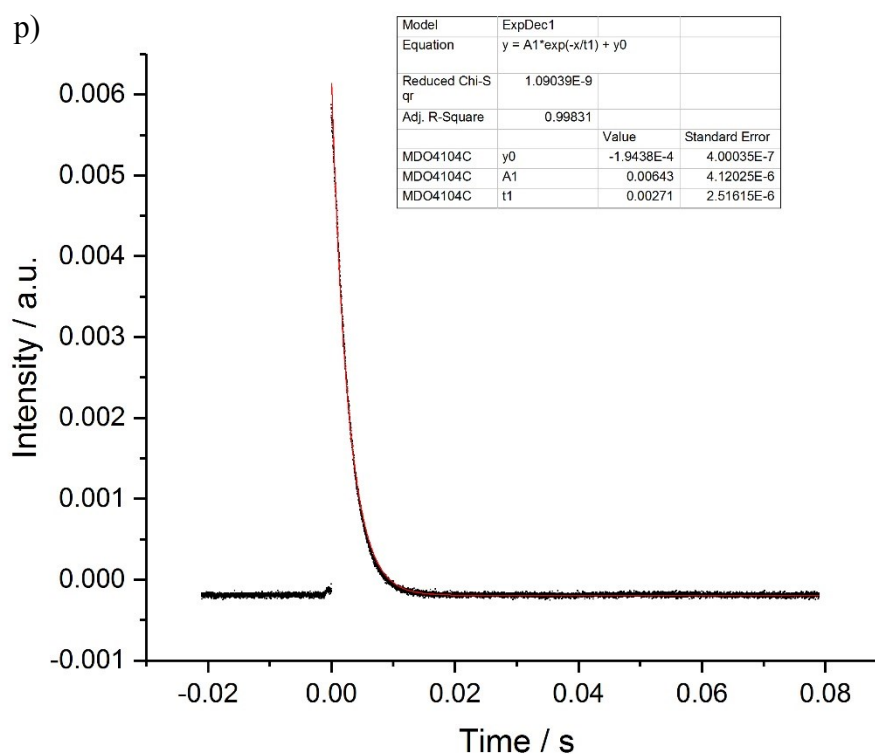

**Figure S8.** Excited state lifetime fitting for the series of heteroleptic complexes ( $\lambda_{\text{exc}} = 355 \text{ nm}$ ): a) and b)  $\text{Cr}(^2\text{E})$  and  $\text{Cr}(^2\text{T}_1)$  lifetimes for **1** in deaerated acetonitrile solution; c) and d)  $\text{Cr}(^2\text{E})$  and  $\text{Cr}(^2\text{T}_1)$  lifetimes for **1** in aerated acetonitrile solution and e)  $\text{Cr}(^2\text{E})$  lifetime for **1** at 77 K in frozen acetonitrile /propionitrile (6/4) solution. f) and g)  $\text{Cr}(^2\text{E})$  and  $\text{Cr}(^2\text{T}_1)$  lifetimes for **2** in deaerated acetonitrile solution; h) and i)  $\text{Cr}(^2\text{E})$  and  $\text{Cr}(^2\text{T}_1)$  lifetimes for **2** in aerated acetonitrile solution and j)  $\text{Cr}(^2\text{E})$  lifetime for **2** at 77 K in frozen acetonitrile /propionitrile (6/4) solution. k) and l)  $\text{Cr}(^2\text{E})$  and  $\text{Cr}(^2\text{T}_1)$  lifetimes for **3** in deaerated acetonitrile solution; m) and n)  $\text{Cr}(^2\text{E})$  and  $\text{Cr}(^2\text{T}_1)$  lifetimes for **3** in aerated acetonitrile solution and p)  $\text{Cr}(^2\text{E})$  lifetime for **3** at 77 K in frozen acetonitrile /propionitrile (6/4) solution.

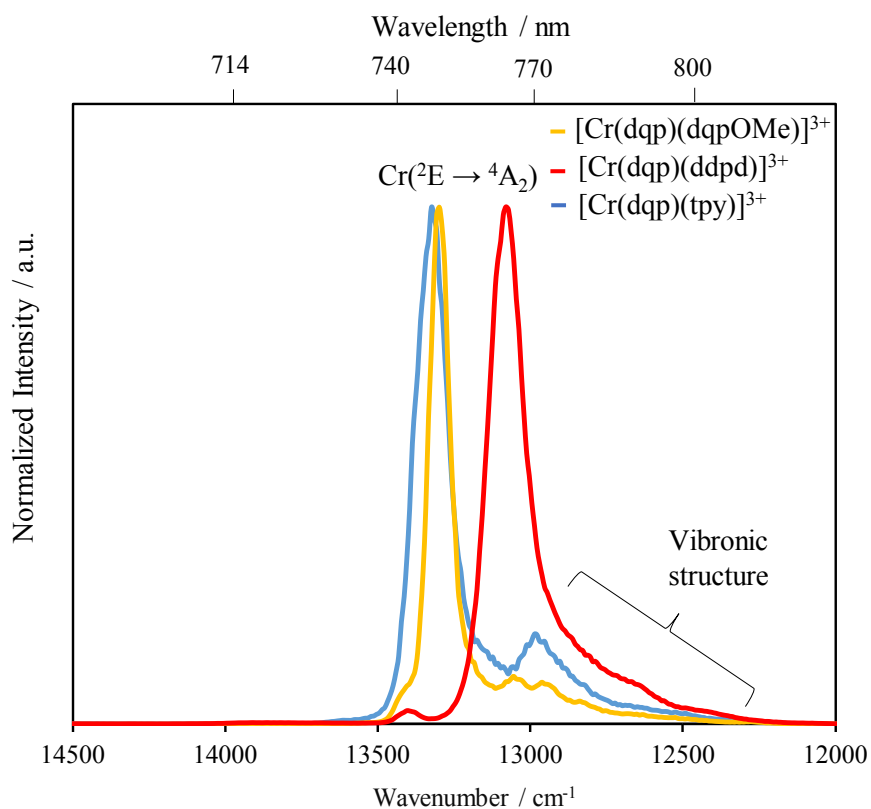

**Figure S9.** Emission spectra at 77 K in frozen acetonitrile /propionitrile (6/4) solution

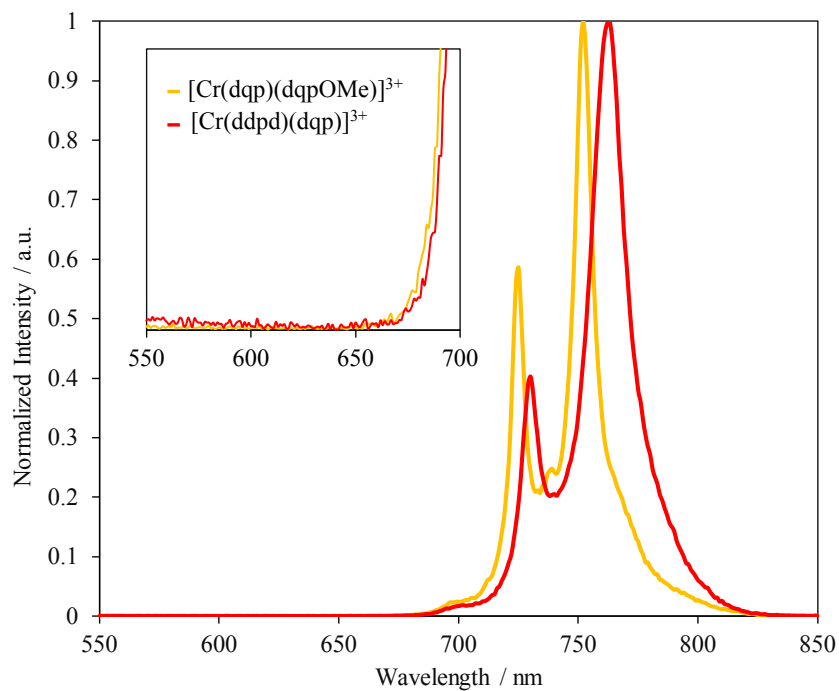

**Figure S10.** Emission spectra at room temperature in acetonitrile solution from 550 to 850 nm

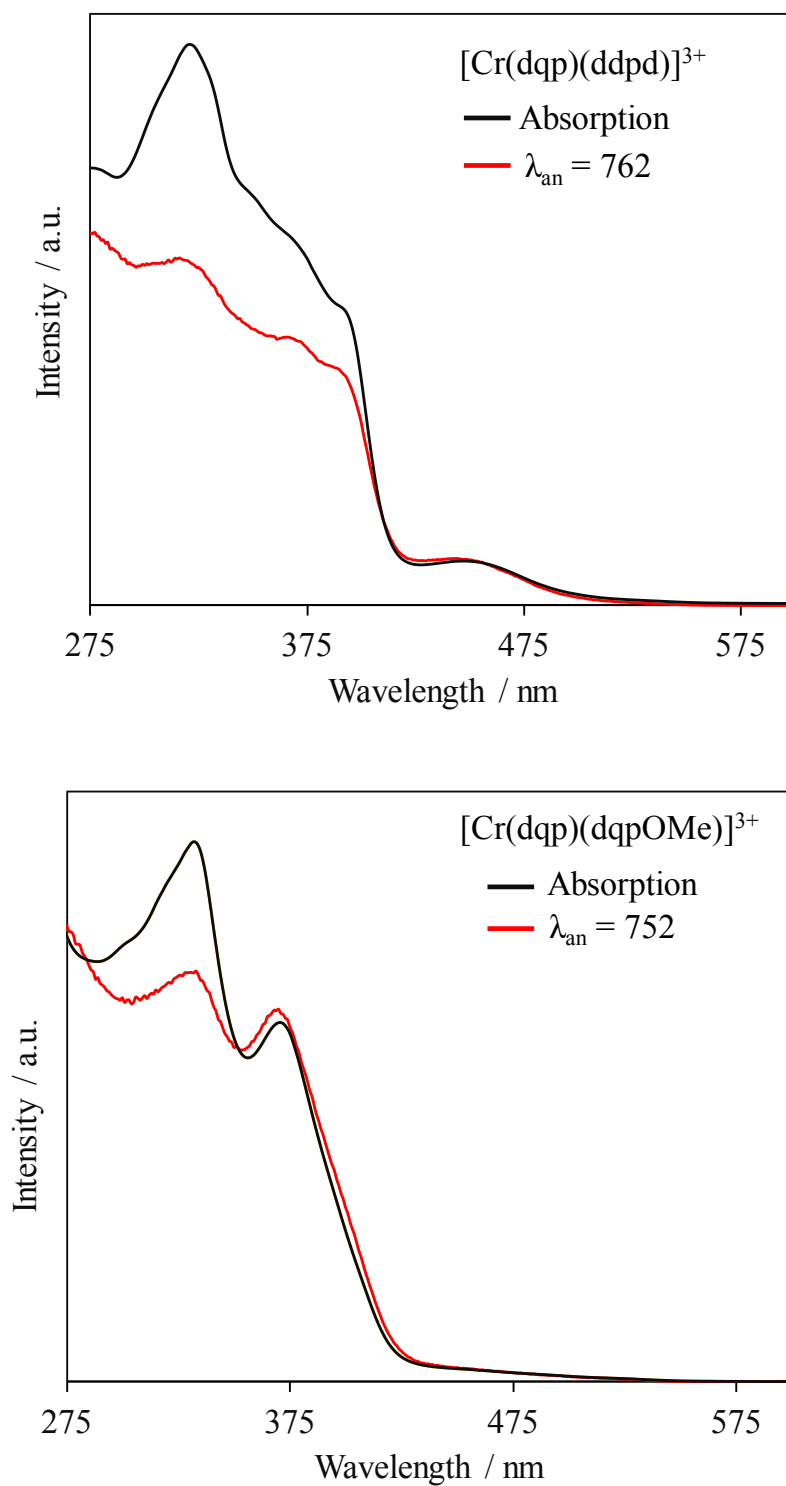

**Figure S11.** Excitation spectra of compounds **2** and **3** at  $\lambda_{\text{an}} = 762$  nm and  $\lambda_{\text{an}} = 752$  respectively in  $\text{CH}_3\text{CN}$  solution.

**Table S15.** Kinetic rate constants and emission quantum yields recorded for **1**, **2** and **3** in acetonitrile and [Cr(dqp)<sub>2</sub>]<sup>3+</sup> in water<sup>S8</sup> at 293 K and 77K. Values in italic type represents the values obtained for aerated solutions, the rest for deaerated solutions.

|                                                    | $k_{Cr,rad}^{2E}$<br>/s <sup>-1</sup> | $k_{Cr,rad}^{2T_1}$<br>/s <sup>-1</sup> | $k_{Cr,nrad}^{2E}$<br>/s <sup>-1</sup> | $k_{Cr,nrad}^{2T_1}$<br>/s <sup>-1</sup> | $\tau_{Cr,obs}^{2E, 2T_1}$<br>/μs | $\tau_{Cr,obs}^{2E, 2T_1}$<br>/μs | $\tau_{Cr,obs}^{2E, 2T_1}$<br>/ms | $\Phi_{Cr}^{Cr(2E)}$<br>/% | $\Phi_{Cr}^{Cr(2T_1)}$<br>/% | $\Phi_{Cr}^L$<br>/% | $\Phi_{Cr}^L$<br>/% | $\eta_{sens}^{L \rightarrow Cr}$<br>/% |
|----------------------------------------------------|---------------------------------------|-----------------------------------------|----------------------------------------|------------------------------------------|-----------------------------------|-----------------------------------|-----------------------------------|----------------------------|------------------------------|---------------------|---------------------|----------------------------------------|
| <b>1</b>                                           | 55(5)                                 | 58(5)                                   | 1699(30)                               | 1696(30)                                 | 578(10)                           | <i>3.0(1)</i>                     | 0.7(1)                            | 3.2(3)                     | 3.4(3)                       | 0.2(1)              | <i>0.0015(1)</i>    | 3.0(5)                                 |
| <b>2</b>                                           | 63(6)                                 | 91(8)                                   | 1500(30)                               | 1472(30)                                 | 642(10)                           | <i>14(2)</i>                      | 1.7(2)                            | 4.0(4)                     | 5.8(5)                       | 6.0(5)              | <i>0.12(1)</i>      | 61(5)                                  |
| <b>3</b>                                           | 11(1)                                 | 62(6)                                   | 1139(20)                               | 1088(20)                                 | 855(10)                           | <i>25(2)</i>                      | 2.7(2)                            | 0.9(1)                     | 5.3(1)                       | 6.5(5)              | <i>0.16(2)</i>      | 100(7)                                 |
| [Cr(dqp) <sub>2</sub> ] <sup>3+</sup> <sup>k</sup> | 30(2)                                 | 89(5)                                   | 803(15)                                | 744(15)                                  | 1200(20)                          | <i>83(5)</i>                      | 3.1(2)                            | 3.6(1)                     | 11.0(1)                      | 7.3(4)              | <i>1.0(1)</i>       | 50(7)                                  |

<sup>a</sup>  $k_{rad}$  obtained from  $k_{rad} = 2303 \times \frac{8\pi cn^2 \tilde{\nu}^2 g_{G.S.}}{N_A g_{E.E.}} \int \varepsilon(\tilde{\nu}) d\tilde{\nu}$  where  $c$  is the velocity of the light in vacuum,  $N_A$  is Avogadro's number,  $n$  is the refractive index of the medium,  $\tilde{\nu}$  is the transition wavenumber,  $\varepsilon$  is the molar absorption coefficient,  $g_{G.S.}$  is the degeneracy of the ground state ( $g(^4A_2) = 4$ ) and  $g_{E.E.}$  represents the degeneracy of the excited states ( $g(^2E) = 4$  and  $g(^2T_1) = 6$ ).<sup>3</sup> <sup>b</sup>  $k_{nrad} = (1/\tau_{obs}) - k_{rad}$  (deaerated solution).<sup>c</sup>  $\tau_{obs}$  from time-resolved experiments at 293K (deaerated solution).<sup>d</sup>  $\tau_{obs}$  from time-resolved experiments at 293K (aerated solution).<sup>e</sup>  $\tau_{obs}$  from time-resolved experiments at 77K. <sup>f,g</sup> Intrinsic quantum yield of the specified Cr level calculated with  $\Phi_{Cr}^{Cr} = k_{rad} \tau_{obs}$  (deaerated solutions). <sup>h,i</sup> Overall quantum yield  $\Phi_{Cr}^L$  measured by relative method using [Cr(ddpd)<sub>2</sub>]<sup>3+</sup> ( $\lambda_{exc} = 435$  nm in H<sub>2</sub>O;  $\Phi_{Cr}^L = 11\%$ ) in <sup>h</sup>deaerated and <sup>i</sup>aerated solutions. <sup>j</sup>  $\eta_{sens}^{L \rightarrow Cr} = \frac{\Phi_{Cr}^L}{\Phi_{Cr}^{Cr(2E)} + \Phi_{Cr}^{Cr(2T_1)}}$  (deaerated solution). Lifetime: estimated relative uncertainty □ 10%. Quantum yield: estimated relative uncertainty □ 10%. <sup>k</sup> Recalculated from ref. S8.

**References**

- (S1) S. Otto, M. Grabolle, C. Förster, C. Kreitner, U. Resch-Genger and K. Heinze, *Angew. Chem., Int. Ed.*, 2015, **54**, 11572–11576.
- (S2) M. Jäger, R.-J. Kumar, H. Görls H., J. Bergquist J. and O. Johansson. *Inorg. Chem.* 2009, **48**, 3228-3238
- (S3) G. Angulo, G. Grampp and A. Rosspeintner, *Spectrochim. Acta Part a-Molecular and Biomolecular Spectroscopy* 2006, **65**, 727-731.
- (S4) H. Ishida, J.-C. G. Bünzli and A. Beeby, *Pure Appl. Chem.*, 2016, **7**, 88
- (S5) G. M. Sheldrick. SHELXT - Integrated Space-group and Crystal-structure Determination. *Acta Cryst. A* 2015, **71**, 3–8.
- (S6) G. M. Sheldrick. Crystal Structure Refinement with SHELXL. *Acta Cryst. C*, 2015, **71**, 3–8.
- (S7) O. V. Dolomanov, L. J. Bourhis, R. J. Gildea, J. A. K. Howard and H. Puschmann, *J Appl. Cryst.* 2009, **42**, 339–341.
- (S8) C. K. Jorgensen, *Adv. Chem. Phys.*, 1963, **5**, 33–146.
- (S9) A. B. P. Lever, *Inorg. Electron. Spectrosc.* Elsevier, Amsterdam, Oxford, New York, Tokyo, 2nd edn, 1984, 126.
- (S10) D. Zare, B. Doistau, H. Nozary, C. Besnard, L. Guénée, Y. Suffren, A.-L. Pelé, A. Hauser and C. Piguet, *Dalton Trans.*, 2017, **46**, 8992-9009.
- (S11) J.-R Jiménez, B. Doistau, C. M. Cruz, C. Besnard, J. M. Cuerva, A. G. Campaña and C. Piguet. *J. Am. Chem. Soc.* 2019, **141**, 13244–13252.
